# Supplementary material for: A multi-omic map of the lipid-producing yeast Rhodosporidium toruloides
Source: PubMed Central journal article supplement — Nat Commun. 2012 Oct 9;3:1112–. doi: 10.1038/ncomms2112 (PMC3493640; doi:10.1038/ncomms2112), 2012-10-09
Supplement: ncomms2112-s1.pdf [file ncomms2112-s1.pdf]

## Supplementary Information for

### A multi-omic map of the lipid-producing yeast *Rhodospiridium toruloides*

Zhiwei Zhu<sup>1,5</sup>, Sufang Zhang<sup>1,3</sup>, Hongwei Liu<sup>2</sup>, Hongwei Shen<sup>1,3</sup>, Xinpeng Lin<sup>1,5</sup>, Fan Yang<sup>1,4</sup>, Yongjin J. Zhou<sup>1,5</sup>, Guojie Jin<sup>1,5</sup>, Mingliang Ye<sup>2</sup>, Hanfan Zou<sup>2</sup>, Zongbao K. Zhao<sup>1,3\*</sup>

<sup>1</sup> Division of Biotechnology, Dalian Institute of Chemical Physics, Chinese Academy of Sciences, 457

Zhongshan Rd., Dalian 116023, China

<sup>2</sup> Key Laboratory of Separation Sciences for Analytical Chemistry, Dalian Institute of Chemical Physics,

Chinese Academy of Sciences, 457 Zhongshan Rd., Dalian 116023, China

<sup>3</sup> Dalian National Laboratory for Clean Energy, 457 Zhongshan Rd., Dalian 116023, China

<sup>4</sup> School of Biological Engineering, Dalian Polytechnic University, 1 Qinggongyuan, Dalian 116034, China

<sup>5</sup> Graduate University of Chinese Academy of Sciences, 19A Yuquanlu, Beijing 100049, China

## **INDEX**

|                                    |       |
|------------------------------------|-------|
| Supplementary Figures S1-S14 ..... | 3-16  |
| Supplementary Tables S1-S10 .....  | 17-31 |
| Supplementary Methods .....        | 32-33 |

## Supplementary Figures

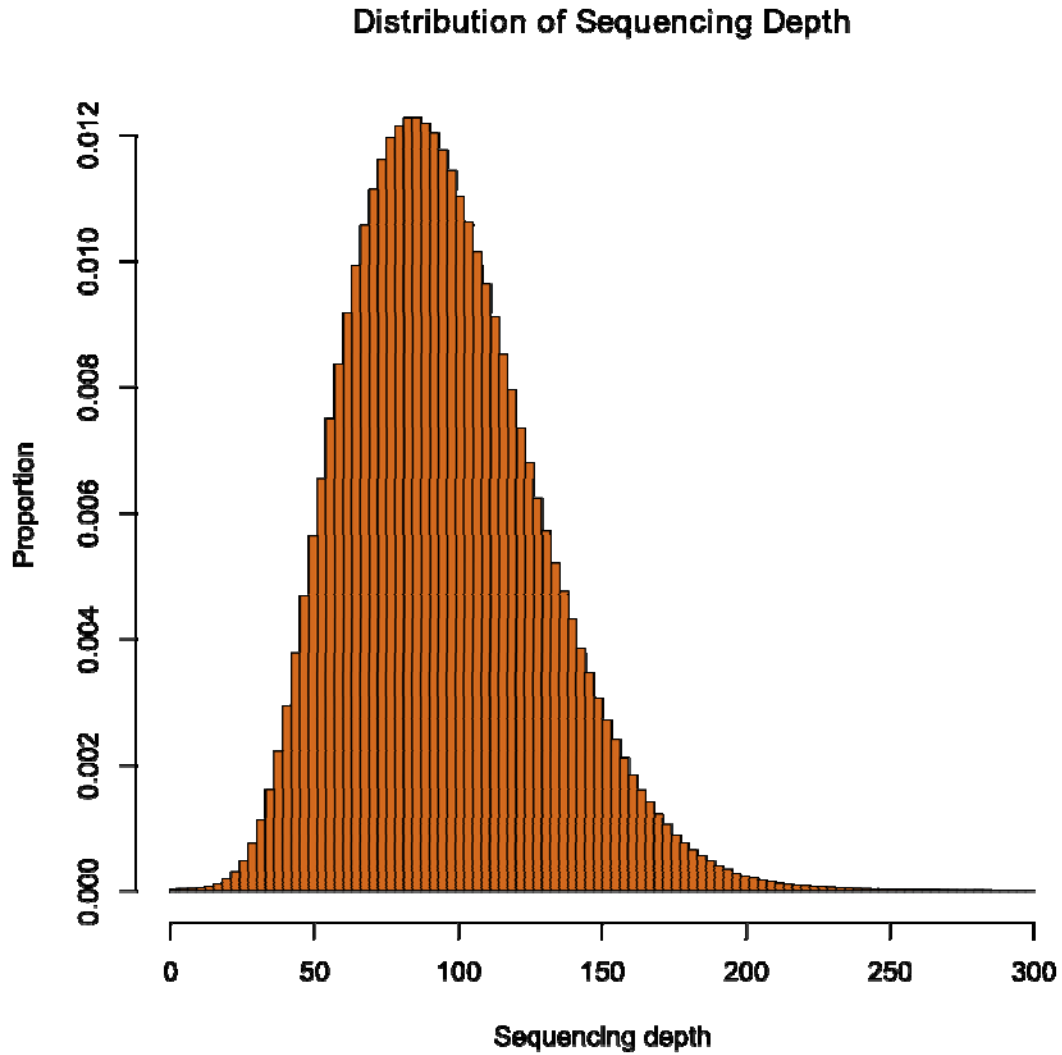

**Supplementary Figure S1.** Sequencing depth distribution. Raw sequencing reads were trimmed with quality threshold  $P = 0.05$  (equivalently to Phred quality score  $Q \approx 13$ ) and length sorted to at least 17 bp. Trimmed reads were mapped to the assembled genome with the read aligner Bowtie. The average sequencing depth was 96 $\times$ .

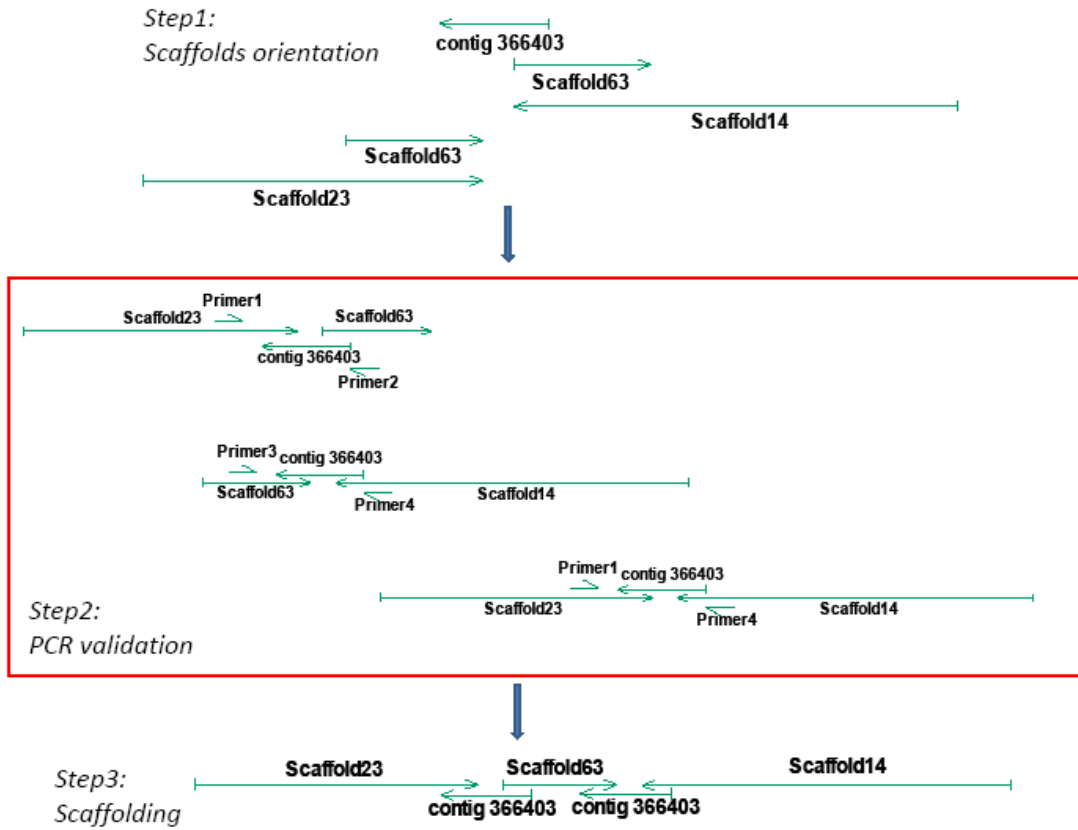

**Supplementary Figure S2.** Short identical sequences prevent further assembly, but targeted sequencing the PCR fragments solved 15 gaps present in the first version of assembly.

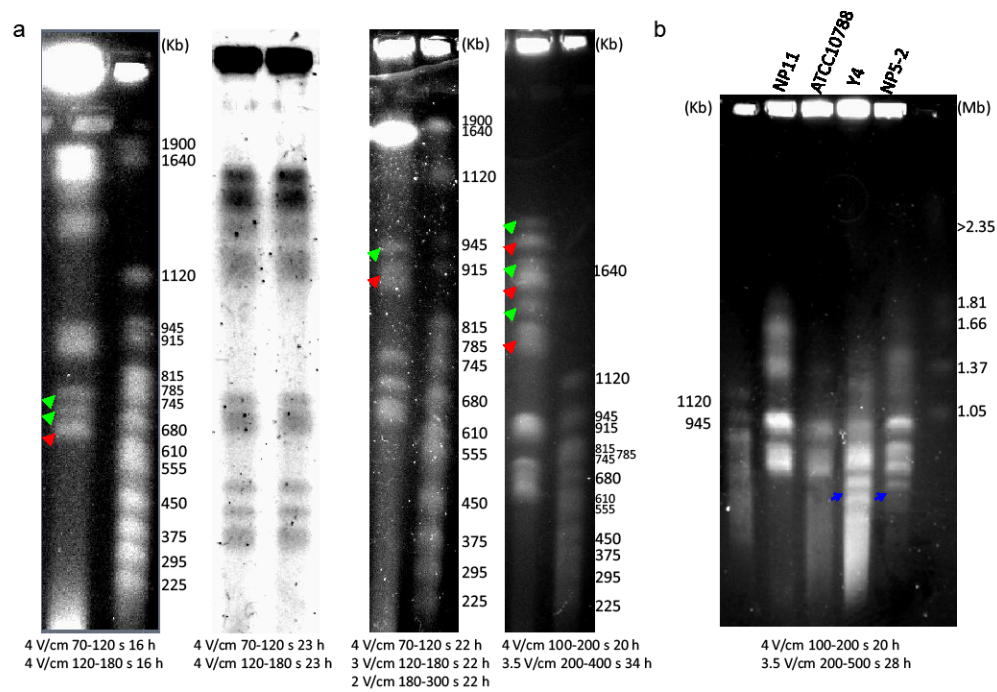

c

| Band  | Chromosome | Estimated length (Kb) |
|-------|------------|-----------------------|
| 1     | 1/2        | 650                   |
| 2     | 3          | 720                   |
| 3     | 4          | 780                   |
| 4     | 5/6        | 875/915               |
| 5     | 7          | 945                   |
| 6     | 8/9        | 1370                  |
| 7     | 10         | 1500                  |
| 8     | 11/12      | 1650                  |
| 9     | 13         | 1700                  |
| 10    | 14/15      | 1800                  |
| 11    | 16         | 1900                  |
| total | 16         | 20 Mb                 |

**Supplementary Figure S3.** Electrophoretic karyotype of *R. toruloides*. (a) Pulsed field gel electrophoresis of *R. toruloides* NP11 using contour-clamped homogeneous electric field technology. Total 11 bands (triangle), corresponding to DNA size ranging from 0.65-1.9 Mb, were distinguished with different parameters (voltage, switch time and period as indicated below the figure). And 5 co-migrated bands were detected for their incongruous staining intensity (red triangle). (b) Chromosomal DNA patterns of *R. toruloides* NP11 (haploid, *MAT A1*), ATCC10788 (haploid, *MAT A1* and type strain), Y4 (diploid, parent strain) and NP5-2 (haploid, *MAT A2*). The electrophoretic bands of *R. toruloides* NP11 are similar to those of type stain ATCC 10788. Smaller chromosomes (blue arrows) are present in the parental stain Y4 and sister strain NP5-2. (c) Estimated Chromosomal length of *R. toruloides* NP11 by PFGE. Two chromosomes were assigned to co-migrated bands, and the total number of chromosomes was estimated to 16. Indeed, 31 canonical telomere repeats (TTAGGG) were present in current assembly and consistent with the estimation.

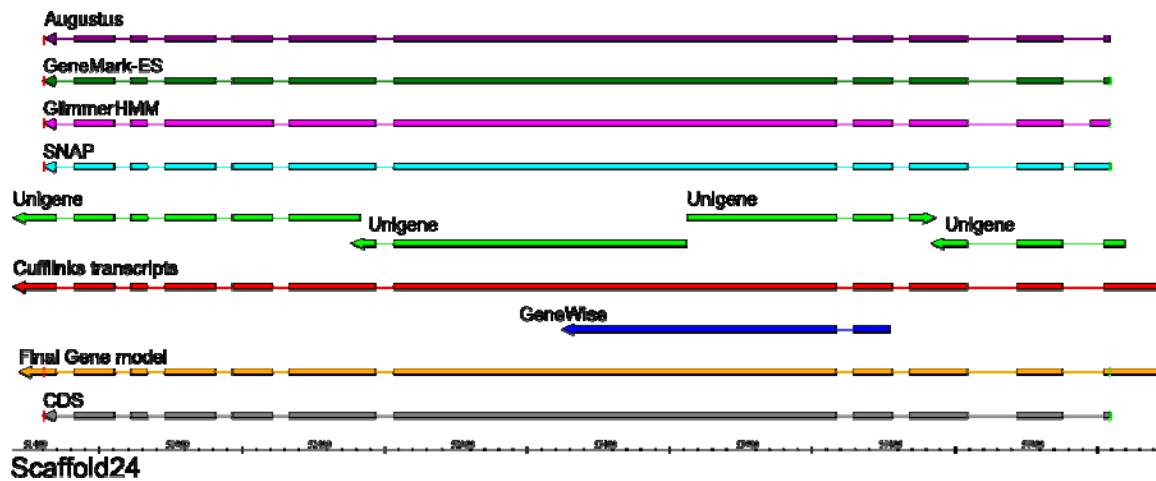

**Supplementary Figure S4.** Manually merged gene model from *de novo* prediction, homology search and RNA-seq alignment. The presented gene was *RHTO\_03906* on the Scaffold24 of the genome assembly (v1).

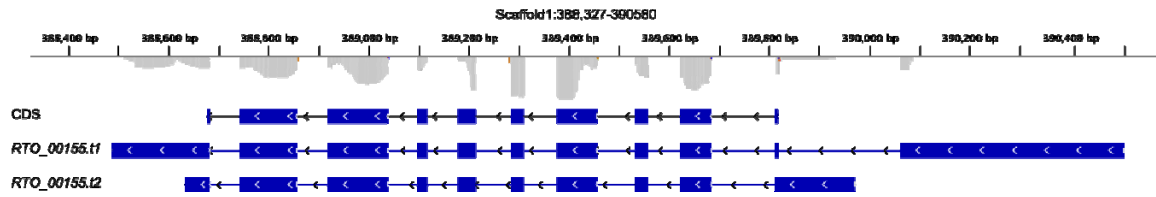

**Supplementary Figure S5.** Alternative splicing in *R. toruloides*. Alternative 5' exons were present in the transcripts of gene *RHTO\_00155*.

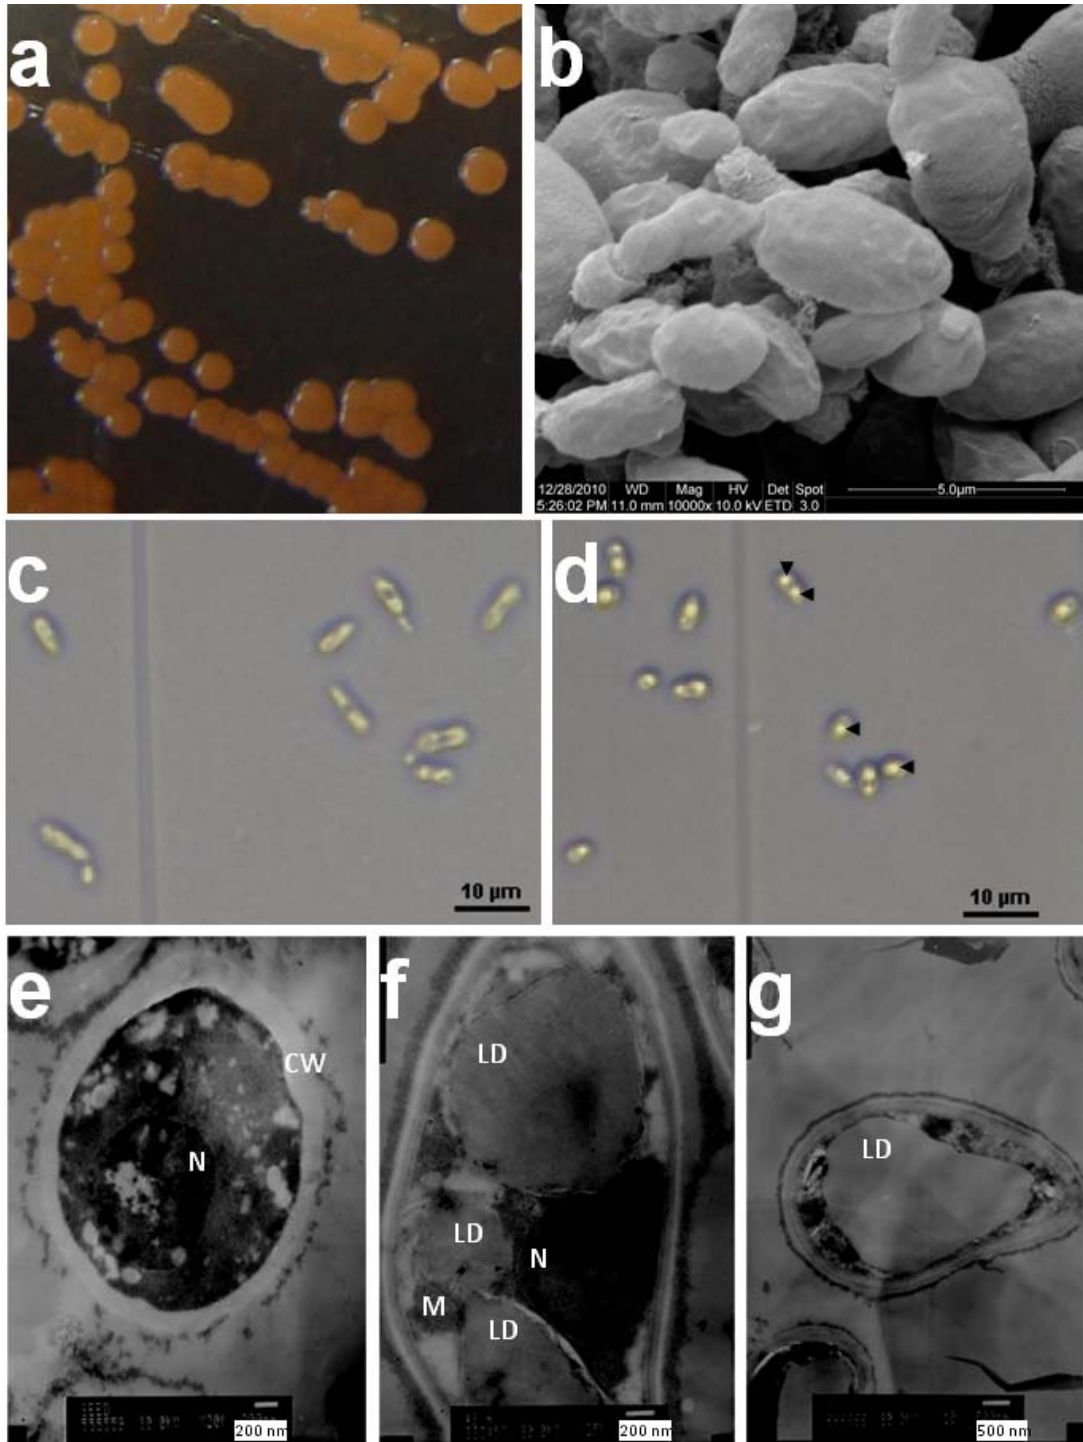

**Supplementary Figure S6.** Morphology of *R. toruloides*. (a) Pink-colored colony. (b) Yeast-like growth by budding. Submerged culture in YEPD (c) and nitrogen-limited medium (d). Ultrastructure of *R. toruloides* in YEPD (e) and nitrogen-limited medium (f and g). N, nucleus; CW, cell wall; M, mitochondrion; LD, lipid droplet; arrows, lipids accumulated in cell.



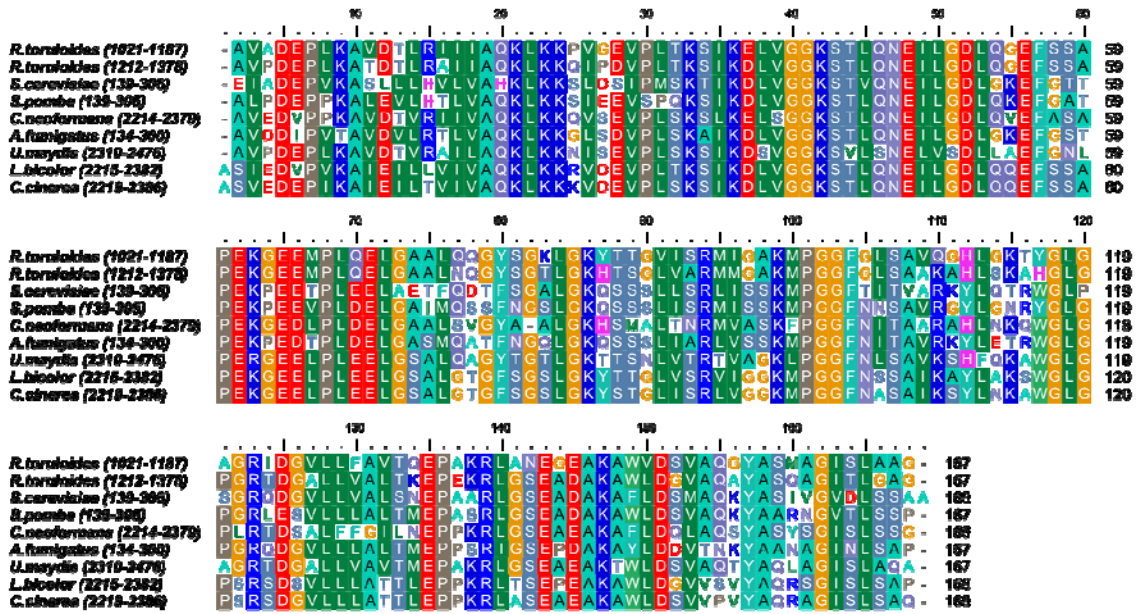

**Supplementary Figure S7.** Sequence alignment of ACP domains from selected fatty acid synthase (FAS). These include alpha subunit of FAS complex from *R. toruloides* (Fas2), *S. cerevisiae* (Genebank Accession number: P19097.2, the same as below), *S. pombe* (BAA11913.1), *C. neoformans* (XP\_571100.1), *Aspergillus fumigatus* (XP\_748738.1), and single polypeptide FAS from *U. maydis* (XP\_759118.1), *L. bicolor* (XP\_001880844.1) and *C. cinerea* (XP\_001836417.1). Numbers in parenthesis indicate the boundary of ACP domains. Two ACP domains of *R. toruloides* are highly similar and separated by a spacer with the length of 25 aa.

1000-KAAPVAAAPPPAPVAAAPAAVADEPLKAVDTLR~~IIIAQKLKPKVGEVPLTKSIKELVGGKSTLQ~~  
~~NEILGDLQGEFSSAPEKGEEMPLQELGAALQQGYSGLGKYTTGVISRMIGAKMPGGFGLSAVQGHLG~~  
~~KTYGLGAGR~~~~IDGVLLFAVTQEP~~AKRLANEGEAKAWVDSVAQGYASMAGISLAAGGAAAAAPAMAF  
 AAPAAAGGGAPAAVPDEPLKATDTLRIIIAQKLKQIPDVPLTKSIKDLVGGKSTLQNEILGDLQGEFSS  
~~APEKGEEMPLQELGAALNQGYSGLGHTSGLVARMMGAKMPGGFGLSAAKAHLSKAHGLGPGR~~TD  
~~GALLVALTKEPEKRLGSEADAKAWLDGVAQAYASQAGITLGAG~~GGGGAAVGGAGFMINTEQLDK-1

400

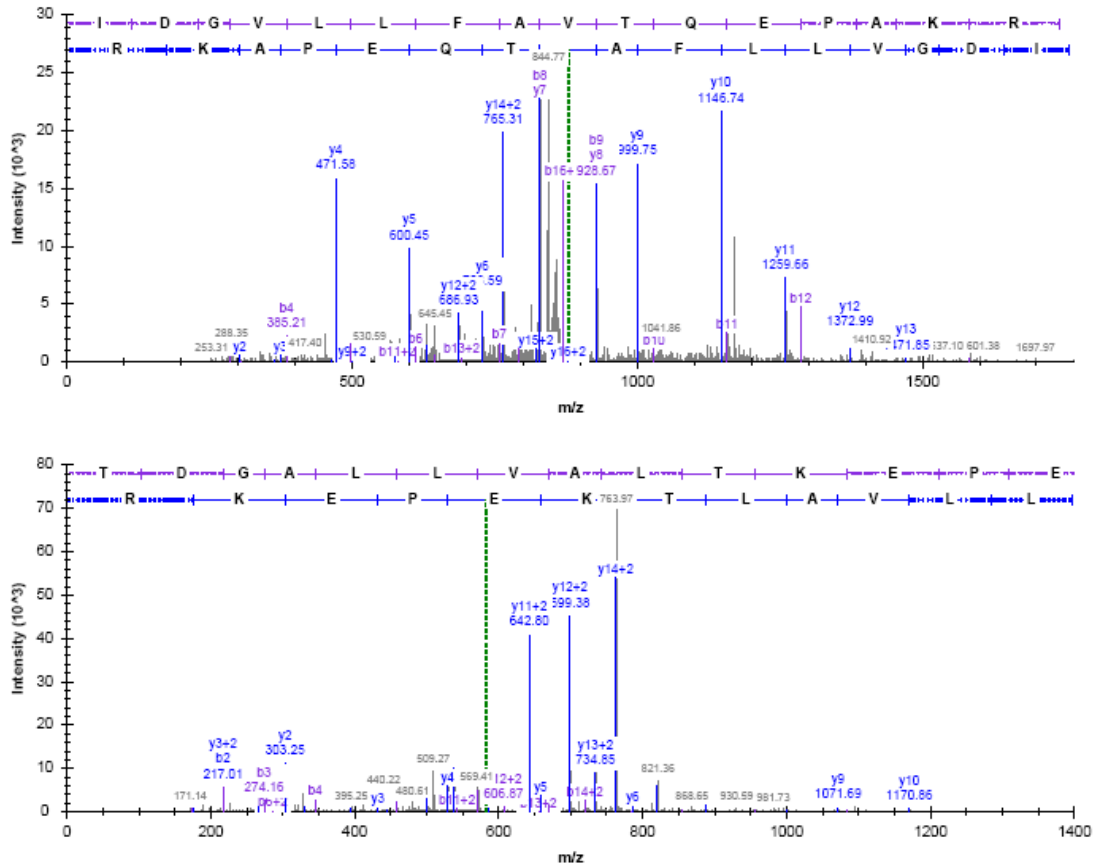

**Supplementary Figure S8.** Sequence with ACP domains was identified by mass spectrometry. All peptides identified by LC-MS/MS were highlighted in red, and ACP domains were masked in cyan. Annotated MS/MS spectra are that of peptides “IDGVLLFAVTQEPAKR” and “TDGALLVALTKEPEKR” which are underlined. Corresponding amino acids of the identified peptides were informed from labeled b- and y-ions.

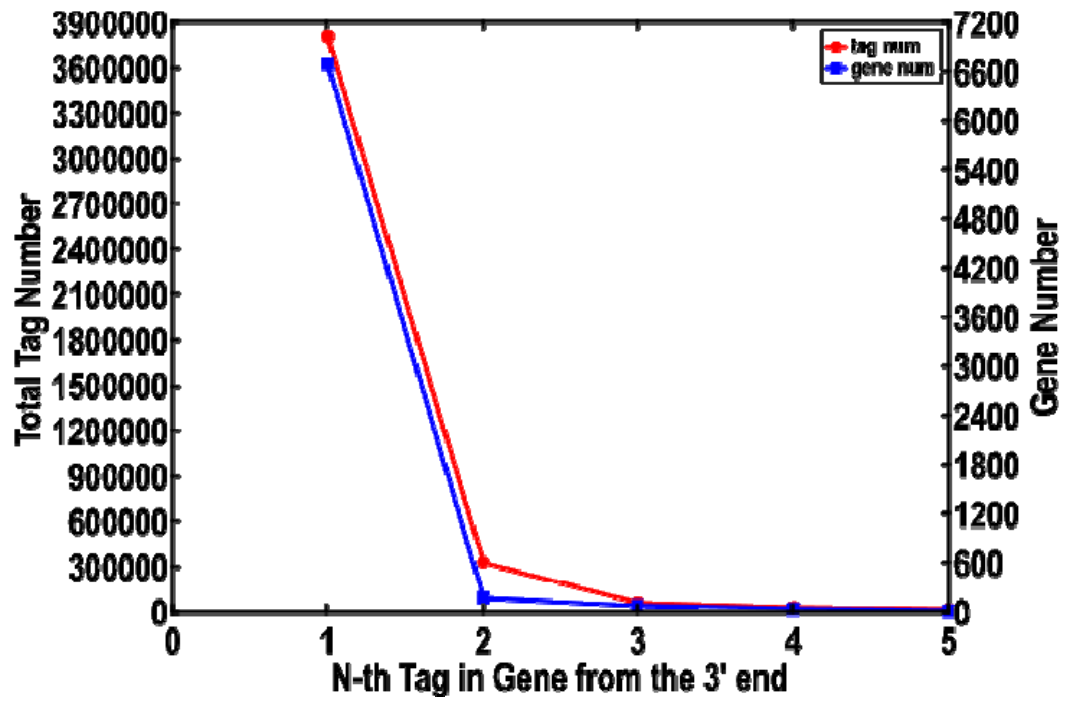

**Supplementary Figure S9.** Tag position in the transcripts. Most of the mapped tags were aligned to the 3'-most NlaIII restriction sites of annotated transcripts.

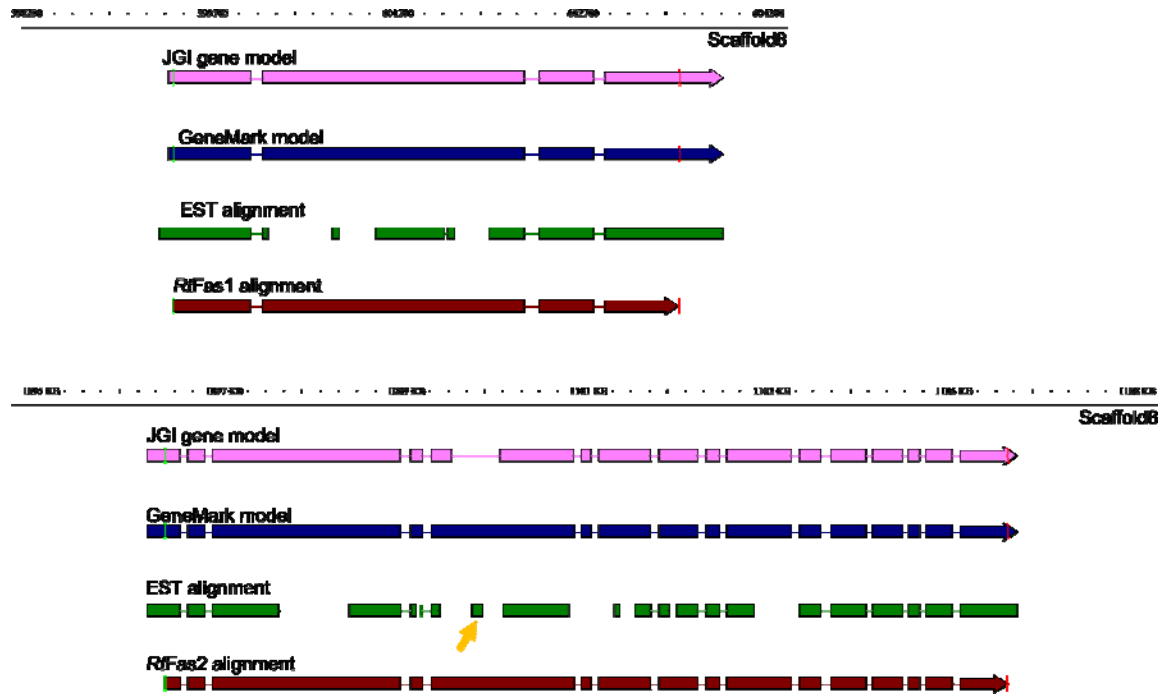

**Supplementary Figure S10.** Similar FAS in *R. graminis* and *R. toruloides*. Despite the annotated model of *FAS2* in *R. graminis* without two ACPs, model predicted by GeneMark and the EST (yellow arrow) at the position of the second ACP may indicate two ACPs in *R. graminis*. JGI gene model, the “Filtered Model” of JGI; GeneMark model, GeneMark predicted gene model; EST alignment, EST aligned using BLAT; *RtFas1/2* alignment, GeneWise predicted gene model with *RtFas1&2*. Data obtained from JGI genome browser ([http://genome.jgi-psf.org/Rhoba1\\_1/Rhoba1\\_1.home.html](http://genome.jgi-psf.org/Rhoba1_1/Rhoba1_1.home.html)). Similar FAS is also found in *S. roseus* and *Rhodotorula glutinis* (data not shown). Noting that sequence data of *R. graminis* were produced by the US Department of Energy Joint Genome Institute (<http://www.jgi.doe.gov/>) in collaboration with the user community. The work conducted by the U.S. Department of Energy Joint Genome Institute is supported by the Office of Science of the U.S. Department of Energy under Contract No. DE-AC02-05CH11231.

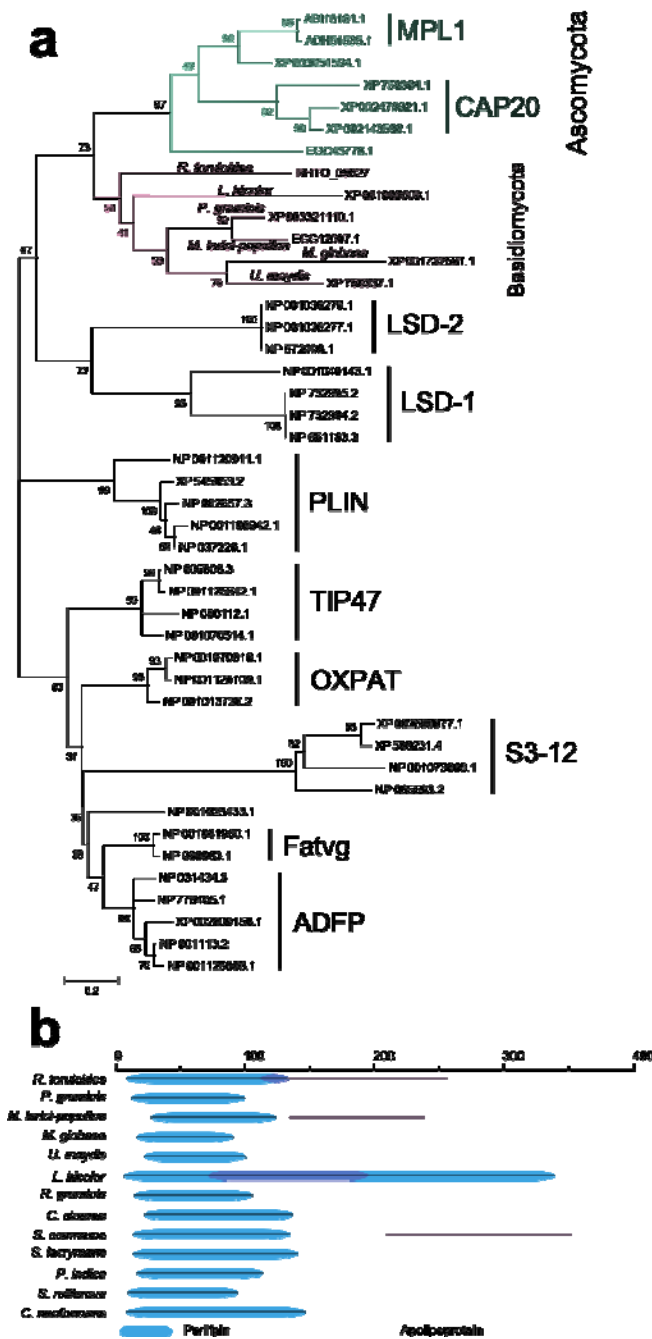

**Supplementary Figure S11.** Perilipins in Basidiomycetes. (a) Neighbor-joining phylogram of perlipin proteins. Perlipin proteins from Basidiomycetes are distinct to CAP20-like proteins from Ascomycetes. Numbers at branches indicate bootstrap support percent with 1000 bootstrap replications. (b) Schematic representation of the perlipin (PF03036) and apolipoprotein (PF01442) domains in perlipin family proteins in Basidiomycetes. These include RH0\_05627 (*R. toruloides*), XP\_003321110.1 (Genebank accession number, the same below, *Puccinia graminis*), EGG12007.1 (*Melampsora larici-populina*), XP\_001732561.1 (*Malassezia globosa*), XP\_760337.1 (*Ustilago maydis*), XP\_001885608.1 (*Laccaria bicolor*), 64920 (JGI protein ID, *Rhodotorula graminis*), XP\_001837169.1 (*Coprinopsis cinerea*), XP\_003032950.1 (*Schizophyllum commune*), EGO03996.1 (*Serpula lacrymans*), CCA75851.1 (*Piriformospora indica*), CBQ68792.1 (*Sporisorium reilianum*), XP\_568844.1 (*Cryptococcus neoformans*).

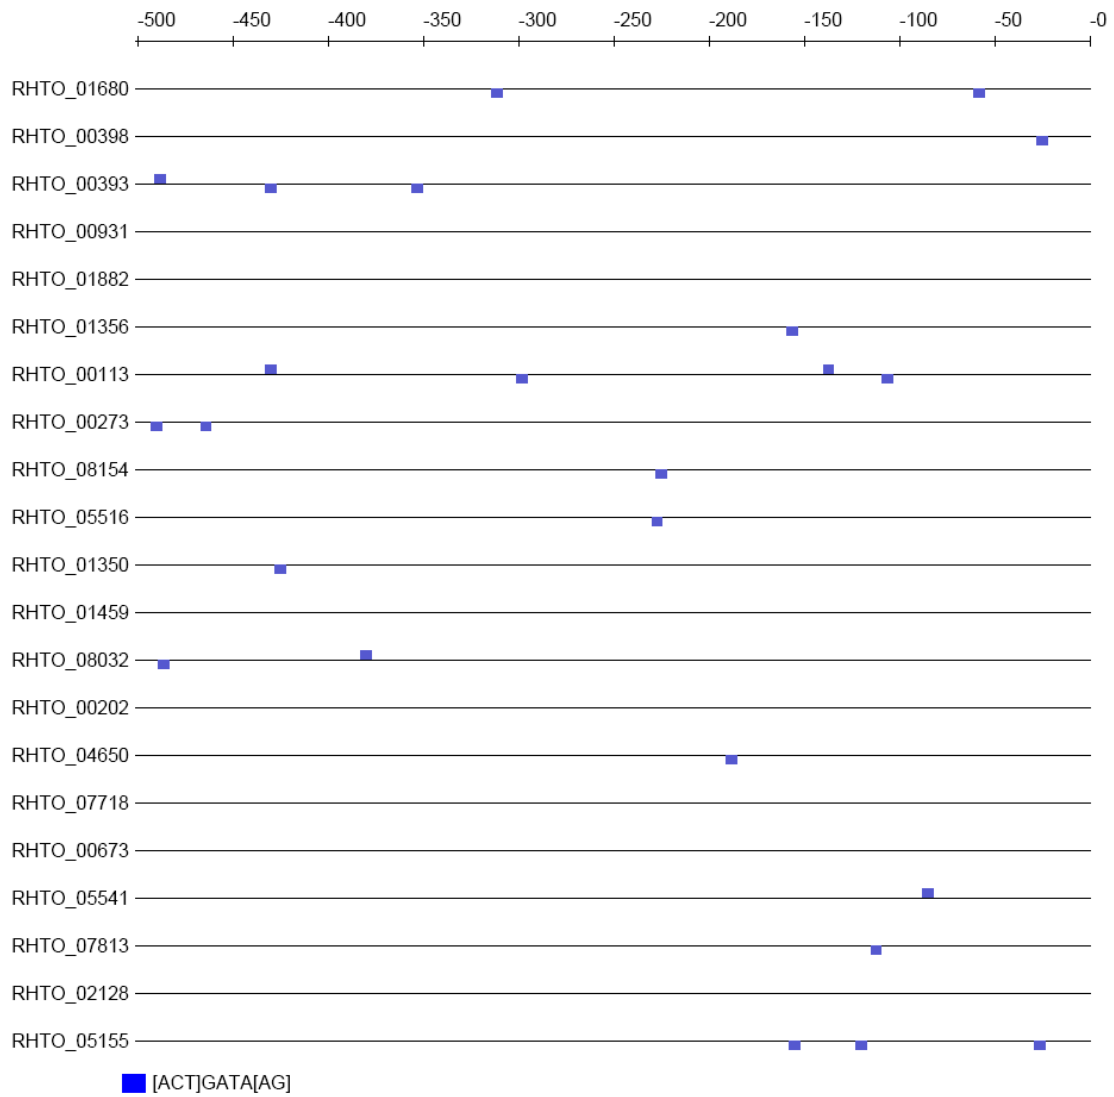

**Supplementary Figure S12.** Putative binding sites of GATA transcription factor in the upstream of genes up-regulated in response to nitrogen limitation (**Supplementary Table S7**). “-0” represent the “A” of the initial codon.

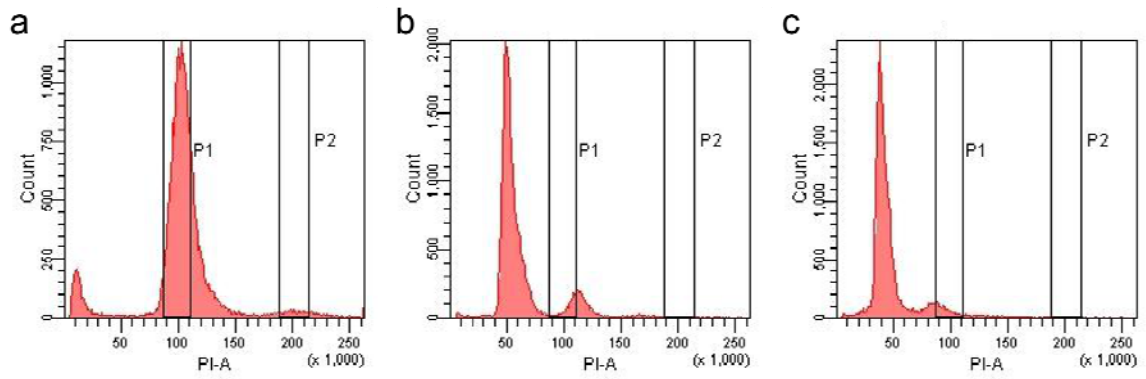

**Supplementary Figure S13.** Ploidy determination of *R. toruloides* with Flow cytometry. Histogram of propidium iodide (PI) fluorescence of ethanol-fixed cells of diploid *R. toruloides* Y4 (**a**), haploid NP11 (**b**) and NP5-2 (**c**) was shown.

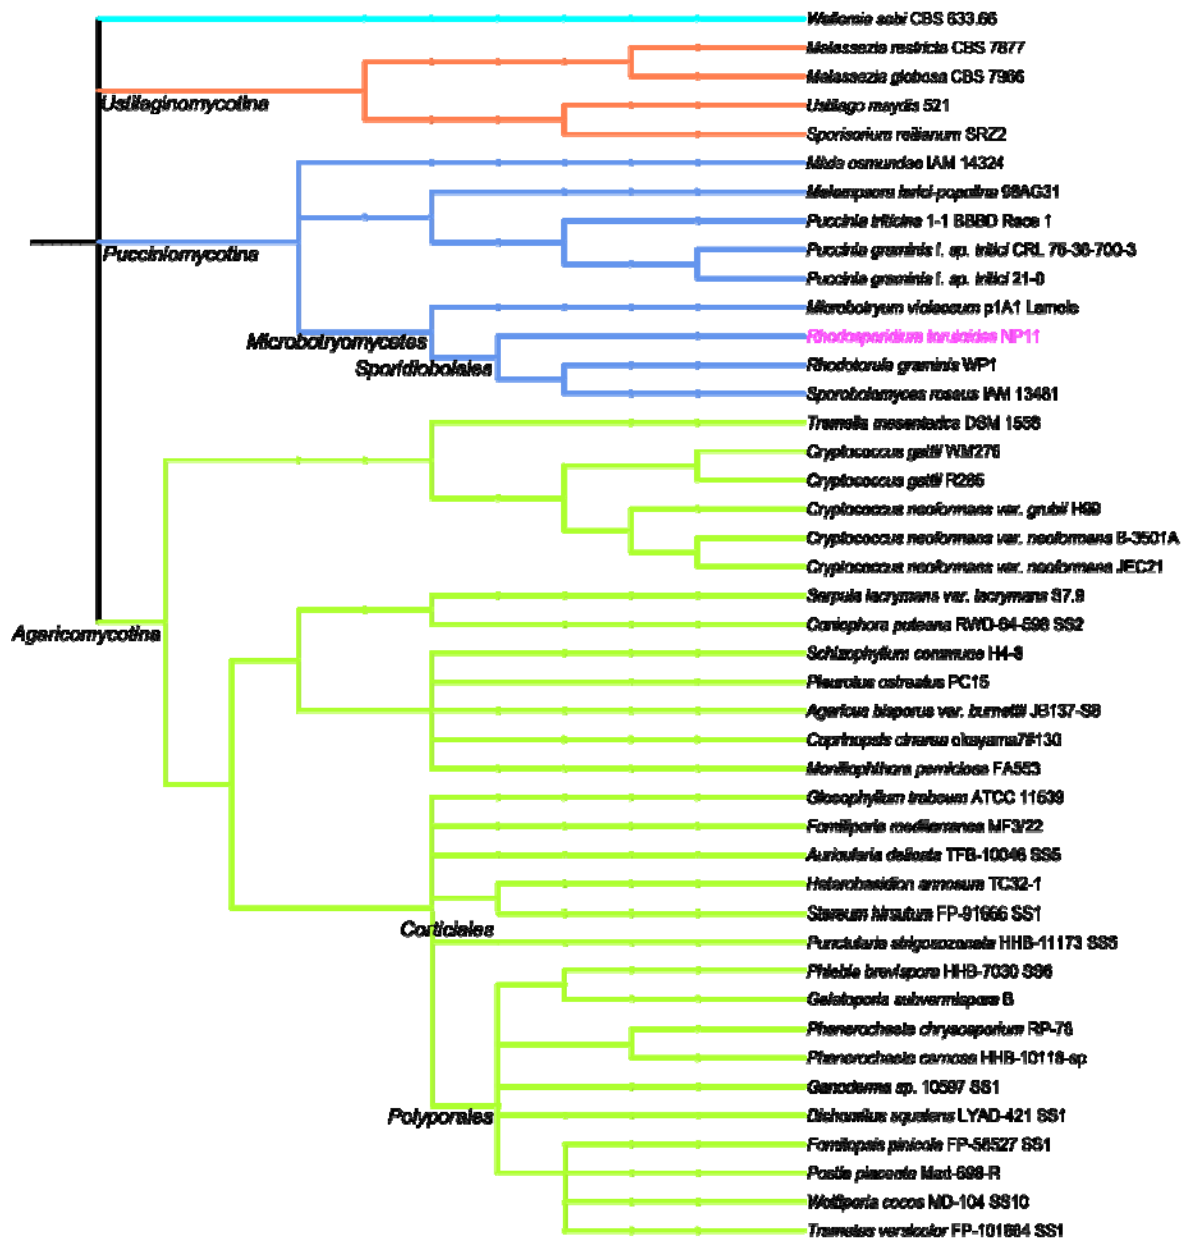

**Supplementary Figure S14.** Taxonomic tree of selected basidiomycete fungi whose genome sequences are available. *R. toruloides* is the member of the order *Sporidiobolales* and the class of *Microbotryomycetes* in the clade of *Pucciniomycotina*, of which few genomes have been sequenced. The genome size of *R. toruloides* (20.2 Mb) is approximately close to the draft assemblies of closely relative species *Rhodotorula graminis* (21.0 Mb) and *Sporobolomyces roseus* (21.2 Mb) released by the DOE Joint Genome Institute. Sequencing status was retrieved from NCBI genome project (<http://www.ncbi.nlm.nih.gov/bioproject>) and JGI fungal Genomics Program (<http://genome.jgi-psf.org/programs/fungi/index.jsf>). The tree was constructed from taxonomy ID in NCBI (<http://www.ncbi.nlm.nih.gov/taxonomy>). Branch lengths are not proportional to genetic distances.



## Supplementary Tables

**Supplementary Table S1.** Primary sequencing data obtained from Illumina sequencing.

| Genome sequencing <sup>a</sup>                      |           |                     |          |          |
|-----------------------------------------------------|-----------|---------------------|----------|----------|
| Insert size                                         | 200 bp    | 200 bp              | 2 kb     | 6 kb     |
| Sequencing platform                                 | GAI       | GAIx                | GAI      | GAIx     |
| Number of reads pair                                | 9560155   | 12269060            | 10293853 | 13407834 |
| Reads length (nt)                                   | 44        | 100/60 <sup>b</sup> | 44       | 44       |
| Total base (Mb)                                     | 841.3     | 1963.0              | 905.9    | 1179.9   |
| RNA-seq                                             |           |                     |          |          |
| Insert size                                         | 200 bp    |                     |          |          |
| Sequencing platform                                 | HiSeq2000 |                     |          |          |
| Number of reads pair                                | 6666667   |                     |          |          |
| Reads length (nt)                                   | 90        |                     |          |          |
| Total base (Mb)                                     | 1200.0    |                     |          |          |
| 3' tag digital gene expression profiling sequencing |           |                     |          |          |
| Sample                                              | MM        | MM-N                |          |          |
| Sequencing platform                                 | GAIx      | GAIx                |          |          |
| Tag length (nt)                                     | 35        | 35                  |          |          |
| Number of tags                                      | 3531500   | 3703000             |          |          |

<sup>a</sup> one lane per genomic library.

<sup>b</sup> 100 nt for forward strand and 60 nt for reverse strand.

**Supplementary Table S2.** *R. toruloides* genome assembly statistics. N50 and L50 are the number and minimum length, respectively, of all sequences that together account for 50% of the assembly.

|                     | Assembly version I |          |       | Assembly version II |
|---------------------|--------------------|----------|-------|---------------------|
|                     | Scaffold           | Contig   | Gap   | Scaffold            |
| <b>N50</b>          | 11                 | 43       | -     | 7                   |
| <b>L50 (bp)</b>     | 574924             | 163970   | -     | 1297466             |
| <b>Total Number</b> | 94                 | 334      | 240   | 34                  |
| <b>Size (bp)</b>    | 20225222           | 20181323 | 43899 | 20254837            |
| <b>Max (bp)</b>     | 1534814            | 480266   | 1676  | 1723588             |

**Supplementary Table S3.** Repetitive sequences in *R. toruloides*. 1.66% of the current version of genome assembly consists of repetitive sequences, and most of which are low complexity sequences.

| <b>Elements</b>                   | <b>Total number</b> | <b>Length (bp)</b> | <b>% assembled genome</b> |
|-----------------------------------|---------------------|--------------------|---------------------------|
| <b>SINEs</b>                      | 35                  | 4510               | 0.02                      |
| <b>LINEs</b>                      | 46                  | 14585              | 0.07                      |
| <b>LTR elements</b>               | 175                 | 73022              | 0.36                      |
| <b>DNA elements</b>               | 21                  | 927                | 0.00                      |
| <b>Unclassified</b>               | 191                 | 66428              | 0.33                      |
| <b>Total interspersed repeats</b> |                     | 159472             | 0.79                      |
| <b>Simple repeats</b>             | 811                 | 36918              | 0.18                      |
| <b>Low complexity</b>             | 1699                | 140162             | 0.69                      |
| <b>Total repetitive sequence</b>  |                     | 336002             | 1.66                      |

**Supplementary Table S4.** Genome feature of *R. toruloides*.

|                                                                                     |            |
|-------------------------------------------------------------------------------------|------------|
| <b>GC content of genome</b>                                                         | 62.03%     |
| <b>GC content of CDS</b>                                                            | 63.12%     |
| <b>Coding genes</b>                                                                 | 8171       |
| <b>Incomplete Genes</b>                                                             | 95         |
| <b>Single exon genes</b>                                                            | 226        |
| <b>Mead Gene density</b>                                                            | 384 per Mb |
| <b>Median Transcript length</b>                                                     | 1882 bp    |
| <b>Median Coding length</b>                                                         | 1337 bp    |
| <b>Median Coding exons per gene</b>                                                 | 5          |
| <b>Median Exon length*</b>                                                          | 146 bp     |
| <b>Median Intron length</b>                                                         | 62 bp      |
| <b>Genes with 5' UTR</b>                                                            | 6408       |
| <b>Median Length of 5' UTR</b>                                                      | 89 bp      |
| <b>Genes with 3' UTR</b>                                                            | 6500       |
| <b>Median Length of 3' UTR</b>                                                      | 92 bp      |
| <b>tRNA genes</b>                                                                   | 117        |
| <b>Spliceosomal RNA</b>                                                             | 6          |
| <b>* 168, 134 and 199 bp for initial, internal and terminal exons, respectively</b> |            |

**Supplementary Table S5.** Functional annotation of genes in *R. toruloides*

|                                                                                                                                                                                                            |             |               |
|------------------------------------------------------------------------------------------------------------------------------------------------------------------------------------------------------------|-------------|---------------|
| <b>Total Genes</b>                                                                                                                                                                                         | <b>8171</b> | <b>100.0%</b> |
| <b>Homology</b>                                                                                                                                                                                            | 6454        | 79.0%         |
| <b>NR alignment<sup>a</sup></b>                                                                                                                                                                            | 6120        | 74.9%         |
| <b>Trembl alignment<sup>a</sup></b>                                                                                                                                                                        | 6171        | 75.5%         |
| <b>SwissProt alignment<sup>a</sup></b>                                                                                                                                                                     | 5096        | 62.4%         |
| <b>KEGG alignment<sup>a</sup></b>                                                                                                                                                                          | 6109        | 74.8%         |
| <b>InterPro<sup>a</sup></b>                                                                                                                                                                                | 5818        | 71.2%         |
| <b>GO annotation</b>                                                                                                                                                                                       | 4910        | 60.1%         |
| <b>KOG<sup>b</sup></b>                                                                                                                                                                                     | 4403        | 53.9%         |
| <b>Expression</b>                                                                                                                                                                                          | 7759        | 95.0%         |
| <b>RNA-seq<sup>c</sup></b>                                                                                                                                                                                 | 7357        | 90.0%         |
| <b>3' tag-seq<sup>d</sup></b>                                                                                                                                                                              | 7045        | 86.2%         |
| <b>Proteomics<sup>e</sup></b>                                                                                                                                                                              | 3108        | 38.0%         |
| <p>a. with a cutoff of 10E-5</p> <p>b. with a cutoff of 10E-10</p> <p>c. &gt;30% length coverage and at least 3 reads</p> <p>d. with at least two tags</p> <p>e. with at least one peptide (FDR&lt;1%)</p> |             |               |

**Supplementary Table S6.** Tag statistics for 3'-tag digital gene expression profiling sequencing of *R. toruloides*.

|                                       |                             | MM                  |                     | MM-N    |         | Total   |         |         |        |
|---------------------------------------|-----------------------------|---------------------|---------------------|---------|---------|---------|---------|---------|--------|
| <b>Tag statistics</b>                 |                             |                     |                     |         |         |         |         |         |        |
| <b>Raw data</b>                       | <b>Distinct tag</b>         | 100146              |                     | 127914  |         | 181443  |         |         |        |
|                                       | <b>Total tag</b>            | 3531500             |                     | 3703000 |         | 7234500 |         |         |        |
| <b>Clean tags<sup>a</sup></b>         | <b>Distinct tag</b>         | 92643               |                     | 119191  |         | 168705  |         |         |        |
|                                       | <b>Total tag</b>            | 3490289             |                     | 3659813 |         | 7150102 |         |         |        |
| <b>Sampled tags<sup>b</sup></b>       | <b>Distinct tag</b>         | 56846               |                     | 60010   |         | 73727   |         |         |        |
|                                       | <b>Total tag</b>            | 3454492             |                     | 3600632 |         | 7055124 |         |         |        |
| <b>Copy number statistics</b>         |                             |                     |                     |         |         |         |         |         |        |
| <b>Copy_Num &gt;0</b>                 | <b>Distinct tag</b>         | 56846               | 100.00%             | 60010   | 100.00% | -       | -       |         |        |
|                                       | <b>Total tag</b>            | 3454492             | 100.00%             | 3600632 | 100.00% | -       | -       |         |        |
| <b>Copy_Num &gt;1</b>                 | <b>Distinct tag</b>         | 46312               | 81.47%              | 48636   | 81.05%  | 73727   | 100.00% |         |        |
|                                       | <b>Total tag</b>            | 3443958             | 99.70%              | 3589258 | 99.68%  | 7055124 | 100.00% |         |        |
| <b>Copy_Num &gt;5</b>                 | <b>Distinct tag</b>         | 18929               | 33.30%              | 20871   | 34.78%  | 31459   | 42.67%  |         |        |
|                                       | <b>Total tag</b>            | 3367163             | 97.47%              | 3510318 | 97.49%  | 6935633 | 98.31%  |         |        |
| <b>Copy_Num &gt;10</b>                | <b>Distinct tag</b>         | 12613               | 22.19%              | 14205   | 23.67%  | 21131   | 28.66%  |         |        |
|                                       | <b>Total tag</b>            | 3319315             | 96.09%              | 3460123 | 96.10%  | 6857248 | 97.20%  |         |        |
| <b>Copy_Num &gt;20</b>                | <b>Distinct tag</b>         | 8646                | 15.21%              | 9814    | 16.35%  | 14172   | 19.22%  |         |        |
|                                       | <b>Total tag</b>            | 3261145             | 94.40%              | 3395696 | 94.31%  | 6756093 | 95.76%  |         |        |
| <b>Copy_Num &gt;50</b>                | <b>Distinct tag</b>         | 5167                | 9.09%               | 5955    | 9.92%   | 8715    | 11.82%  |         |        |
|                                       | <b>Total tag</b>            | 3149843             | 91.18%              | 3269879 | 90.81%  | 6581129 | 93.28%  |         |        |
| <b>Copy_Num &gt;100</b>               | <b>Distinct tag</b>         | 3378                | 5.94%               | 3843    | 6.40%   | 5887    | 7.98%   |         |        |
|                                       | <b>Total tag</b>            | 3021558             | 87.47%              | 3118755 | 86.62%  | 6378458 | 90.41%  |         |        |
| <b>Mapping statistics<sup>c</sup></b> |                             |                     |                     |         |         |         |         |         |        |
| <b>Map to transcripts</b>             | <b>Sense (Unique)</b>       | <b>Distinct tag</b> | 24750               | 43.54%  | 24497   | 40.82%  | 28616   | 38.81%  |        |
|                                       |                             | <b>Total tag</b>    | 2314492             | 67.00%  | 2000070 | 55.55%  | 4314562 | 61.16%  |        |
|                                       |                             | <b>Gene</b>         | 6887                | 84.29%  | 6916    | 84.64%  | 7045    | 86.22%  |        |
|                                       | <b>Sense (Multiple)</b>     | <b>Distinct tag</b> | 380                 | 0.67%   | 401     | 0.67%   | 440     | 0.60%   |        |
|                                       |                             | <b>Total tag</b>    | 137938              | 3.99%   | 117168  | 3.25%   | 254106  | 3.60%   |        |
|                                       |                             | <b>Gene</b>         | 165                 | 2.02%   | 163     | 1.99%   | 184     | 2.25%   |        |
|                                       | <b>Antisense (Unique)</b>   | <b>Distinct tag</b> | 13544               | 23.83%  | 12894   | 21.49%  | 15648   | 21.22%  |        |
|                                       |                             | <b>Total tag</b>    | 238570              | 6.91%   | 163347  | 4.54%   | 401917  | 5.70%   |        |
|                                       |                             | <b>Gene</b>         | 5746                | 70.32%  | 5595    | 68.47%  | 6069    | 74.27%  |        |
|                                       | <b>Antisense (Multiple)</b> | <b>Distinct tag</b> | 101                 | 0.18%   | 95      | 0.16%   | 116     | 0.16%   |        |
|                                       |                             | <b>Total tag</b>    | 2634                | 0.08%   | 1616    | 0.05%   | 4299    | 0.06%   |        |
|                                       |                             | <b>Gene</b>         | 141                 | 1.73%   | 134     | 1.64%   | 153     | 1.87%   |        |
|                                       | <b>Total</b>                | <b>Distinct tag</b> | 38775               | 68.21%  | 37887   | 63.13%  | 44820   | 60.79%  |        |
|                                       |                             | <b>Total tag</b>    | 2693634             | 77.97%  | 2282250 | 63.38%  | 4975884 | 70.53%  |        |
|                                       |                             | <b>Gene</b>         | 7121                | 87.15%  | 7135    | 87.32%  | 7251    | 88.74%  |        |
|                                       | <b>Map to genome</b>        | <b>Total</b>        | <b>Distinct tag</b> | 43670   | 76.82%  | 42911   | 71.51%  | 51387   | 69.70% |
|                                       |                             |                     | <b>Total tag</b>    | 3084829 | 89.30%  | 2664186 | 73.99%  | 5890651 | 83.49% |
|                                       | <b>Unmapped tag</b>         | <b>Total</b>        | <b>Distinct tag</b> | 13176   | 23.18%  | 17099   | 28.49%  | 22340   | 30.30% |
| <b>Total tag</b>                      |                             |                     | 369663              | 10.70%  | 936446  | 26.01%  | 1164473 | 16.51%  |        |

a. Removing adaptor tags and tags of low quality.

b. Only tags with occurrence  $\geq 2$  in total.

c. No more than 1 bp mismatch.

**Supplementary Table S7.** Genes related to nitrogen metabolite repression and their expression during N starvation.

| Gene symbol      | ORF        | Tag counts |      | TPM<br>(tag per million) |         | Ratio<br>MM-N/MM | P-value* | Annotation                                               |
|------------------|------------|------------|------|--------------------------|---------|------------------|----------|----------------------------------------------------------|
|                  |            | MM         | MM-N | MM                       | MM-N    |                  |          |                                                          |
| <i>MEP2</i>      | RHTO_01680 | 63         | 663  | 18.24                    | 184.13  | 10.1             | 0        | ammonium transmembrane transporter                       |
| <i>MEP1</i>      | RHTO_01846 | 117        | 87   | 33.87                    | 24.16   | 0.7              | 1.7E-02  | ammonium transmembrane transporter                       |
|                  | RHTO_00398 | 62         | 149  | 17.95                    | 41.38   | 2.3              | 8.2E-09  | amino acid transmembrane transporter                     |
|                  | RHTO_00393 | 0          | 3    | 0.01                     | 0.83    | 83               | 1.4E-01  | amino acid transmembrane transporter                     |
|                  | RHTO_00931 | 42         | 398  | 12.16                    | 110.54  | 9.1              | 9.7E-14  | amino acid transmembrane transporter                     |
|                  | RHTO_01882 | 421        | 1345 | 121.87                   | 373.55  | 3.1              | 4.1E-13  | amino acid transporter                                   |
|                  | RHTO_03593 | 1151       | 1551 | 333.19                   | 430.76  | 1.3              | 3.7E-11  | amino acid transmembrane transporter                     |
|                  | RHTO_07825 | 168        | 52   | 48.63                    | 14.44   | 0.3              | 1.0E-16  | dicarboxylic amino acid permease                         |
|                  | RHTO_07915 | 1050       | 396  | 303.95                   | 109.98  | 0.4              | 1.1E-74  | amino acid transmembrane transporter                     |
|                  | RHTO_01356 | 177        | 1704 | 51.24                    | 473.25  | 9.2              | 0        | oligopeptide transporter                                 |
| <i>DUR3</i>      | RHTO_00113 | 18         | 36   | 5.21                     | 10      | 1.9              | 2.2E-02  | urea transporter                                         |
| <i>URO1</i>      | RHTO_03331 | 161        | 167  | 46.61                    | 46.48   | 1.0              | 9.6E-01  | urate oxidase                                            |
|                  | RHTO_00273 | 27         | 137  | 7.82                     | 38.05   | 4.9              | 2.1E-11  | Transthyretin/hydroxyisourate hydrolase family protein   |
|                  | RHTO_02662 | 681        | 789  | 197.13                   | 219.13  | 1.1              | 4.3E-02  | OHCU decarboxylase family protein                        |
| <i>DAL2/3</i>    | RHTO_08154 | 39         | 191  | 11.29                    | 53.05   | 4.7              | 9.7E-14  | allantoicase                                             |
| <i>URE1</i>      | RHTO_05516 | 96         | 198  | 27.79                    | 54.99   | 2.0              | 1.6E-08  | urease                                                   |
| <i>DUR1,2</i>    | RHTO_01350 | 0          | 6    | 0.01                     | 1.67    | 167.0            | 1.8E-02  | urea carboxylase / allophanate hydrolase                 |
| <i>DAL1</i>      | RHTO_00639 | -          | -    | -                        | -       | -                | -        | allantoinase                                             |
| <i>DAL7/MLS1</i> | RHTO_01459 | 73         | 515  | 21.13                    | 143.03  | 6.8              | 0.0E+00  | malate synthase                                          |
| <i>PUT1</i>      | RHTO_08032 | 39         | 63   | 11.29                    | 17.5    | 1.6              | 3.0E-02  | proline dehydrogenase                                    |
| <i>PUT2</i>      | RHTO_07378 | 805        | 61   | 233.03                   | 16.94   | 0.1              | 1.4E-173 | delta-1-pyrroline-5-carboxylate dehydrogenase            |
| <i>NR</i>        | RHTO_02415 | 27         | 20   | 7.82                     | 5.55    | 0.7              | 2.5E-01  | nitrate reductase (NADH)                                 |
| <i>NIR</i>       | RHTO_02416 | 16         | 9    | 4.63                     | 2.5     | 0.5              | 1.4E-01  | nitrite reductase                                        |
| <i>NRT2</i>      | RHTO_02417 | -          | -    | -                        | -       | -                | -        | MFS nitrate transporter                                  |
| <i>NRT1</i>      | RHTO_04837 | -          | -    | -                        | -       | -                | -        | nitrate transporter                                      |
| <i>CARI</i>      | RHTO_05160 | 1026       | 358  | 297                      | 99.43   | 0.3              | 3.4E-81  | arginase                                                 |
| <i>UGA4</i>      | RHTO_05974 | 64         | 91   | 18.53                    | 25.27   | 1.4              | 5.6E-02  | GABA permease                                            |
| <i>UGA1</i>      | RHTO_00202 | 255        | 1492 | 73.82                    | 414.37  | 5.6              | 0        | 4-aminobutyrate transaminase                             |
| <i>GDH1</i>      | RHTO_04650 | 701        | 2437 | 202.92                   | 676.83  | 3.3              | 1.4E-13  | glutamate dehydrogenase (NADP+)                          |
| <i>GDH2</i>      | RHTO_07718 | 88         | 196  | 25.47                    | 54.43   | 2.1              | 8.7E-10  | glutamate dehydrogenase (NAD+)                           |
| <i>GLN1</i>      | RHTO_00673 | 2268       | 5681 | 656.54                   | 1577.78 | 2.4              | 0        | glutamine synthetase                                     |
| <i>GLN2</i>      | RHTO_00401 | 107        | 117  | 30.97                    | 32.49   | 1.05             | 7.2E-01  | glutamine synthetase                                     |
| <i>GLT1</i>      | RHTO_00025 | 362        | 234  | 104.79                   | 64.99   | 0.62             | 8.3E-09  | GOGAT, glutamate synthase                                |
| <i>NPR1</i>      | RHTO_05632 | 29         | 48   | 8.39                     | 13.33   | 1.6              | 8.1E-02  | protein serine/threonine kinase                          |
| <i>NPR2</i>      | RHTO_03203 | 77         | 38   | 22.29                    | 10.55   | 0.5              | 2.9E-04  | nitrogen permease regulator Npr2                         |
| <i>NPR3</i>      | RHTO_03073 | 22         | 24   | 6.37                     | 6.67    | 1.0              | 9.2E-01  | Nitrogen permease regulator 3                            |
| <i>NPI1</i>      | RHTO_02946 | 589        | 299  | 170.50                   | 83.04   | 0.5              | 1.9E-24  | E3 ubiquitin-protein ligase NEDD4                        |
| <i>PRB1</i>      | RHTO_05541 | 148        | 325  | 42.84                    | 90.26   | 2.1              | 0.0E+00  | autophagic serine protease Alp2                          |
| <i>LAP1</i>      | RHTO_00296 | 48         | 38   | 13.89                    | 10.55   | 0.8              | 2.9E-01  | aminopeptidase 2                                         |
| <i>PEP4</i>      | RHTO_07813 | 202        | 920  | 58.47                    | 255.51  | 4.4              | 0        | saccharopepsin                                           |
| <i>CPS1</i>      | RHTO_03874 | 81         | 25   | 23.45                    | 6.96    | 0.3              | 3.5E-08  | Gly-Xaa carboxypeptidase                                 |
|                  | RHTO_02128 | 40         | 91   | 11.58                    | 25.27   | 2.2              | 2.1E-05  | amino acid transporter                                   |
|                  | RHTO_03777 | 28         | 43   | 8.11                     | 11.94   | 1.5              | 1.7E-01  | vacuolar amino acid transporter 4                        |
|                  | RHTO_05155 | 2          | 18   | 0.58                     | 5       | 8.6              | 1.1E-03  | vacuolar amino acid transporter 1                        |
| <i>ATG1</i>      | RHTO_06351 | 57         | 451  | 16.50                    | 125.26  | 7.6              | 3.6E-14  | Serine/threonine protein kinase ATG1                     |
| <i>ATG2</i>      | RHTO_01885 | 20         | 59   | 5.79                     | 16.39   | 2.8              | 6.0E-05  | autophagy regulatory protein Atg2                        |
| <i>ATG20</i>     | RHTO_04181 | 19         | 70   | 5.50                     | 19.44   | 3.5              | 3.6E-07  | sorting nexin-41                                         |
| <i>ATG8</i>      | RHTO_06526 | 181        | 402  | 52.40                    | 111.65  | 2.1              | 6.6E-13  | GABA(A) receptor-associated protein                      |
| <i>VMA5</i>      | RHTO_04163 | 23         | 220  | 6.66                     | 61.10   | 9.2              | 1.3E-09  | V-type H+-transporting ATPase subunit C                  |
| <i>VMA9</i>      | RHTO_07443 | 180        | 500  | 52.11                    | 138.86  | 2.7              | 1.6E-12  | ATPase, V0 complex, subunit E                            |
| <i>VMA11</i>     | RHTO_01541 | 28         | 109  | 8.11                     | 30.27   | 3.7              | 8.4E-11  | V-type H+-transporting ATPase 21kDa proteolipid subunit  |
| <i>AMS1</i>      | RHTO_00613 | 28         | 83   | 8.11                     | 23.05   | 2.8              | 1.3E-06  | alpha-mannosidase, glycoside hydrolase family 38 protein |
| <i>ATG15</i>     | RHTO_00361 | 25         | 57   | 7.24                     | 15.83   | 2.2              | 7.6E-04  | triacylglycerol lipase, homolog of ATG15                 |
| <i>AMD1</i>      | RHTO_00810 | 98         | 152  | 28.37                    | 42.21   | 1.5              | 2.0E-03  | AMP deaminase                                            |

\* Audic&Claverie's test (ref 58).

**Supplementary Table S8.** Genes related to central and lipid metabolisms and their expression during N starvation.

| Gene symbol | ORF        | Tag counts |       | TPM<br>(tag per million) |         | Ratio<br>MM-N/MM | P-value* | Annotation                                                                          |
|-------------|------------|------------|-------|--------------------------|---------|------------------|----------|-------------------------------------------------------------------------------------|
|             |            | MM         | MM-N  | MM                       | MM-N    |                  |          |                                                                                     |
| HXX1        | RHTO_06072 | 270        | 515   | 78.16                    | 143.03  | 1.8              | 3.8E-13  | hexokinase                                                                          |
| HXX2        | RHTO_06870 | 8          | 12    | 2.32                     | 3.33    | 1.4              | 4.4E-01  | hexokinase                                                                          |
| GPI1        | RHTO_04058 | 31         | 22    | 8.97                     | 6.11    | 0.7              | 1.7E-01  | glucose-6-phosphate isomerase                                                       |
| PFK1        | RHTO_00494 | 46         | 61    | 13.32                    | 16.94   | 1.3              | 2.2E-01  | 6-phosphofruktokinase                                                               |
| FBP1        | RHTO_03046 | 1149       | 1526  | 332.61                   | 423.81  | 1.3              | 4.7E-10  | fructose-1,6-bisphosphatase I                                                       |
| FBA1        | RHTO_03043 | 2064       | 7776  | 597.48                   | 2159.62 | 3.6              | 0.0E+00  | fructose-bisphosphate aldolase, class II                                            |
| TP11        | RHTO_01329 | 680        | 2020  | 196.85                   | 561.01  | 2.8              | 2.5E-13  | triosephosphate isomerase (TIM)                                                     |
| GAPDH       | RHTO_03746 | 10729      | 7128  | 3105.81                  | 1979.65 | 0.6              | 4.0E-195 | glyceraldehyde 3-phosphate dehydrogenase                                            |
| PGK1        | RHTO_00033 | 787        | 1381  | 227.82                   | 383.54  | 1.7              | 1.0E-12  | phosphoglycerate kinase                                                             |
| GPM1        | RHTO_03049 | 92         | 62    | 26.63                    | 17.22   | 0.6              | 7.5E-03  | phosphoglycerate mutase                                                             |
| GPM2        | RHTO_04793 | 45         | 39    | 13.03                    | 10.83   | 0.8              | 4.0E-01  | phosphoglycerate mutase                                                             |
| GPM3        | RHTO_05036 | 312        | 310   | 90.32                    | 86.1    | 1.0              | 5.5E-01  | phosphoglycerate mutase                                                             |
| GPM4        | RHTO_07773 | -          | -     | -                        | -       | -                | -        | protein of phosphoglycerate mutase 1 family                                         |
| ENO1        | RHTO_00323 | 3848       | 4669  | 1113.91                  | 1296.72 | 1.2              | 6.3E-12  | enolase                                                                             |
| PYK1        | RHTO_01610 | 218        | 274   | 63.11                    | 76.1    | 1.2              | 3.9E-02  | pyruvate kinase                                                                     |
| PDA1        | RHTO_01852 | 160        | 96    | 46.32                    | 26.66   | 0.6              | 1.4E-05  | pyruvate dehydrogenase E1 component subunit alpha                                   |
| PDB1        | RHTO_07250 | 282        | 533   | 81.63                    | 148.03  | 1.8              | 5.9E-13  | pyruvate dehydrogenase E1 component subunit beta                                    |
| LAT1        | RHTO_03543 | 3272       | 3195  | 947.17                   | 887.34  | 0.9              | 8.7E-03  | pyruvate dehydrogenase E2 component                                                 |
| CIT1        | RHTO_06406 | 122        | 90    | 35.32                    | 25      | 0.7              | 1.2E-02  | citrate synthase, mitochondrial                                                     |
| CIT2        | RHTO_07345 | 128        | 120   | 37.05                    | 33.33   | 0.9              | 4.0E-01  | citrate synthase                                                                    |
| ACO1        | RHTO_00539 | 76         | 85    | 22                       | 23.61   | 1.1              | 6.6E-01  | aconitate hydratase                                                                 |
| ACO2        | RHTO_08030 | 88         | 152   | 25.47                    | 42.21   | 1.7              | 1.3E-04  | aconitate hydratase                                                                 |
| IDH1        | RHTO_01289 | 2566       | 3704  | 742.8                    | 1028.71 | 1.4              | 0.0E+00  | isocitrate dehydrogenase (NAD+)                                                     |
| IDH2        | RHTO_01290 | 3792       | 2293  | 1097.7                   | 636.83  | 0.6              | 3.4E-97  | isocitrate dehydrogenase (NAD+)                                                     |
| IDP1        | RHTO_04315 | 326        | 1649  | 94.37                    | 457.98  | 4.9              | 5.6E-13  | isocitrate dehydrogenase (NADP+), mitochondrial precursor                           |
| KGD1        | RHTO_07860 | 1023       | 1261  | 296.14                   | 350.22  | 1.2              | 6.5E-05  | 2-oxoglutarate dehydrogenase E1 component (succinyl-transferring)                   |
| KGD2        | RHTO_02312 | 64         | 57    | 18.53                    | 15.83   | 0.9              | 3.9E-01  | 2-oxoglutarate dehydrogenase E2 component (dihydroliipoamide succinyltransferase)   |
| LPD1        | RHTO_07893 | 3274       | 2664  | 947.75                   | 739.87  | 0.8              | 1.8E-21  | dihydroliipoil dehydrogenase                                                        |
| LSC1        | RHTO_01205 | 24         | 32    | 6.95                     | 8.89    | 1.3              | 3.7E-01  | succinyl-CoA synthetase alpha subunit                                               |
| LSC2        | RHTO_05264 | 121        | 135   | 35.03                    | 37.49   | 1.1              | 5.9E-01  | succinyl-CoA synthetase beta subunit                                                |
| SDH1        | RHTO_05714 | 443        | 324   | 128.24                   | 89.98   | 0.7              | 1.1E-06  | succinate dehydrogenase (ubiquinone) flavoprotein subunit                           |
| SDH2        | RHTO_06068 | 1058       | 930   | 306.27                   | 258.29  | 0.8              | 1.5E-04  | succinate dehydrogenase (ubiquinone) iron-sulfur protein                            |
| SDH3        | RHTO_00534 | 2566       | 206   | 742.8                    | 57.21   | 0.1              | 0.0E+00  | succinate dehydrogenase (ubiquinone) cytochrome b subunit                           |
| SDH4        | RHTO_00723 | 2008       | 2890  | 581.27                   | 802.64  | 1.4              | 0.0E+00  | succinate dehydrogenase (ubiquinone) membrane anchor subunit                        |
| FUM1        | RHTO_05746 | 378        | 1726  | 109.42                   | 479.36  | 4.4              | 5.7E-13  | fumarate hydratase, class II                                                        |
| MDH1        | RHTO_04363 | 6953       | 5634  | 2012.74                  | 1564.73 | 0.8              | 4.4E-45  | L-malate dehydrogenase, mitochondrial                                               |
| MDH2        | RHTO_03745 | 1565       | 1301  | 453.03                   | 361.33  | 0.8              | 1.5E-09  | L-malate dehydrogenase                                                              |
| CTP1        | RHTO_03384 | 4          | 8     | 1.16                     | 2.22    | 1.9              | 3.0E-01  | mitochondrial tricarboxylate transporter, citrate transporter                       |
| ACL1        | RHTO_03915 | 20829      | 19480 | 6029.54                  | 5410.16 | 0.9              | 1.5E-27  | ATP citrate synthase                                                                |
| MAE1        | RHTO_07218 | 165        | 204   | 47.76                    | 56.66   | 1.2              | 1.0E-01  | malic enzyme, mitochondrial                                                         |
| ME1         | RHTO_03795 | 249        | 58    | 72.08                    | 16.11   | 0.2              | 2.6E-31  | malic enzyme                                                                        |
| PYC1        | RHTO_02628 | 473        | 2903  | 136.92                   | 806.25  | 5.9              | 3.3E-13  | pyruvate carboxylase                                                                |
| PDC1        | RHTO_00098 | 193        | 285   | 55.87                    | 79.15   | 1.4              | 1.7E-04  | pyruvate decarboxylase                                                              |
| ALD1        | RHTO_05838 | 364        | 486   | 105.37                   | 134.98  | 1.3              | 3.4E-04  | aldehyde dehydrogenase (NAD)                                                        |
| ALD2        | RHTO_04425 | 42         | 53    | 12.16                    | 14.72   | 1.2              | 3.6E-01  | aldehyde dehydrogenase, mitochondrial                                               |
| ALD3        | RHTO_04310 | 12         | 21    | 3.47                     | 5.83    | 1.7              | 1.5E-01  | aldehyde dehydrogenase                                                              |
| ALD4        | RHTO_06724 | -          | -     | -                        | -       | -                | -        | aldehyde dehydrogenase                                                              |
| ALD5        | RHTO_04543 | 4          | 6     | 1.16                     | 1.67    | 1.4              | 6.0E-01  | aldehyde dehydrogenase                                                              |
| ACS1        | RHTO_08027 | 227        | 329   | 65.71                    | 91.37   | 1.4              | 1.2E-04  | acetyl-CoA synthetase                                                               |
| ACH1        | RHTO_07106 | 114        | 148   | 33                       | 41.1    | 1.2              | 7.8E-02  | acetyl-CoA hydrolase                                                                |
| ACC1        | RHTO_02004 | 125        | 120   | 36.18                    | 33.33   | 0.9              | 5.2E-01  | acetyl-CoA carboxylase                                                              |
| FAS1        | RHTO_02032 | 955        | 4697  | 276.45                   | 1304.49 | 4.7              | 1.2E-12  | fatty acid synthase subunit beta, fungi type                                        |
| FAS2        | RHTO_02139 | 1641       | 3123  | 475.03                   | 867.35  | 1.8              | 1.1E-12  | fatty acid synthase subunit alpha, fungi type                                       |
| ERG10       | RHTO_02048 | 88         | 1433  | 25.47                    | 397.99  | 15.6             | 6.7E-16  | acetyl-CoA C-acetyltransferase                                                      |
| ERG13       | RHTO_02305 | 792        | 762   | 229.27                   | 211.63  | 0.9              | 1.1E-01  | hydroxymethylglutaryl-CoA synthase                                                  |
| HMG1        | RHTO_04045 | 31         | 21    | 8.97                     | 5.83    | 0.6              | 1.3E-01  | hydroxymethylglutaryl-CoA reductase (NADPH)                                         |
| ERG12?      | RHTO_02122 | 73         | 398   | 21.13                    | 110.54  | 5.2              | 0.0E+00  | cystathionine beta-lyase                                                            |
| ERG8        | RHTO_02073 | 65         | 26    | 18.82                    | 7.22    | 0.4              | 1.5E-05  | phosphomevalonate kinase                                                            |
| MVD1        | RHTO_06005 | 69         | 58    | 19.97                    | 16.11   | 0.8              | 2.3E-01  | diphosphomevalonate decarboxylase                                                   |
| ID11        | RHTO_05138 | 205        | 280   | 59.34                    | 77.76   | 1.3              | 3.2E-03  | isopentenyl-diphosphate delta-isomerase                                             |
| ERG20       | RHTO_01660 | 108        | 234   | 31.26                    | 64.99   | 2.1              | 7.9E-11  | farnesyl diphosphate synthase                                                       |
| BTS1        | RHTO_02504 | 97         | 212   | 28.08                    | 58.88   | 2.1              | 4.2E-10  | geranylgeranyl diphosphate synthase, type III                                       |
| ERG9        | RHTO_02590 | 165        | 136   | 47.76                    | 37.77   | 0.8              | 4.2E-02  | farnesyl-diphosphate farnesyltransferase                                            |
| PSY1        | RHTO_03752 | 45         | 44    | 13.03                    | 12.22   | 0.9              | 7.6E-01  | protein of squalene/phytoene synthase family                                        |
| CRT1        | RHTO_04602 | 2905       | 1632  | 840.93                   | 453.25  | 0.5              | 1.3E-92  | Phytoene dehydrogenase                                                              |
| ICL1        | RHTO_03507 | 148        | 241   | 42.84                    | 66.93   | 1.6              | 1.5E-05  | isocitrate lyase, mitochondrial                                                     |
| ICL2        | RHTO_05768 | 96         | 408   | 27.79                    | 113.31  | 4.1              | 0.0E+00  | isocitrate lyase                                                                    |
| MLS1/DAL7   | RHTO_01459 | 73         | 515   | 21.13                    | 143.03  | 6.8              | 0.0E+00  | malate synthase                                                                     |
| ZWF1        | RHTO_07853 | 731        | 1433  | 211.61                   | 397.99  | 1.9              | 0.0E+00  | glucose-6-phosphate 1-dehydrogenase                                                 |
| SOL3        | RHTO_07939 | 3518       | 3131  | 1018.38                  | 869.57  | 0.9              | 1.2E-10  | 6-phosphogluconolactonase                                                           |
| GND1        | RHTO_02788 | 6120       | 935   | 1771.61                  | 259.68  | 0.1              | 0.0E+00  | 6-phosphogluconate dehydrogenase                                                    |
| RPE1        | RHTO_05984 | 117        | 170   | 33.87                    | 47.21   | 1.4              | 5.4E-03  | ribulose-phosphate 3-epimerase                                                      |
| RK11        | RHTO_06311 | 24         | 3     | 6.95                     | 0.83    | 0.1              | 1.7E-05  | ribose 5-phosphate isomerase A                                                      |
| TAL1        | RHTO_06955 | 3210       | 7771  | 929.22                   | 2158.23 | 2.3              | 0.0E+00  | transaldolase                                                                       |
| TKL1        | RHTO_03248 | 3825       | 2593  | 1107.25                  | 720.15  | 0.7              | 2.1E-65  | transketolase                                                                       |
| PGM1        | RHTO_07820 | 141        | 84    | 40.82                    | 23.33   | 0.6              | 3.8E-05  | phosphoglucomutase                                                                  |
| PGM2        | RHTO_01766 | 6          | 21    | 1.74                     | 5.83    | 3.4              | 5.2E-03  | phosphoglucomutase                                                                  |
| PCK1        | RHTO_07480 | 12         | 22    | 3.47                     | 6.11    | 1.8              | 1.2E-01  | phosphoenolpyruvate carboxykinase (ATP)                                             |
| OAC1        | RHTO_00349 | 202        | 221   | 58.47                    | 61.38   | 1.0              | 6.2E-01  | oxaloacetate carrier                                                                |
| ODC1        | RHTO_03731 | 50         | 359   | 14.47                    | 99.7    | 6.9              | 2.2E-14  | mitochondrial 2-oxodicarboxylate carrier                                            |
| GDH1        | RHTO_04650 | 701        | 2437  | 202.92                   | 676.83  | 3.3              | 1.4E-13  | glutamate dehydrogenase (NADP+)                                                     |
| GDH2        | RHTO_07718 | 88         | 196   | 25.47                    | 54.43   | 2.1              | 8.7E-10  | glutamate dehydrogenase (NAD+)                                                      |
| GLN1        | RHTO_00673 | 2268       | 5681  | 656.54                   | 1577.78 | 2.4              | 0.0E+00  | glutamine synthetase                                                                |
| GLT2        | RHTO_00025 | 362        | 234   | 104.79                   | 64.99   | 0.6              | 8.3E-09  | GOGAT, glutamate synthase                                                           |
| GLN2        | RHTO_00401 | 107        | 117   | 30.97                    | 32.49   | 1.0              | 7.2E-01  | glutamine synthetase                                                                |
| ACR1        | RHTO_05007 | 60         | 333   | 17.37                    | 92.48   | 5.3              | 0.0E+00  | mitochondrial carrier protein, succinate:fumarate antiporter                        |
| GPD1        | RHTO_08013 | 16         | 12    | 4.63                     | 3.33    | 0.7              | 3.9E-01  | glycerol-3-phosphate dehydrogenase (NAD+)                                           |
| GPD2        | RHTO_02273 | 66         | 115   | 19.11                    | 31.94   | 1.7              | 7.4E-04  | glycerol-3-phosphate dehydrogenase (NAD+)                                           |
| GNPAT1      | RHTO_06391 | 64         | 28    | 18.53                    | 7.78    | 0.4              | 7.0E-05  | glyceronephosphate O-acyltransferase                                                |
| GAT1        | RHTO_03058 | 422        | 446   | 122.16                   | 123.87  | 1.0              | 8.4E-01  | glycerol-3-phosphate O-acyltransferase / dihydroxyacetone phosphate acyltransferase |
| AYR1        | RHTO_03193 | 24         | 44    | 6.95                     | 12.22   | 1.8              | 2.4E-02  | 1-acylglycerone phosphate reductase                                                 |
| SLC1        | RHTO_06718 | 181        | 105   | 52.4                     | 29.16   | 0.6              | 1.2E-06  | 1-acylglycerol-3-phosphate acyltransferase                                          |
| PAH1        | RHTO_04894 | 48         | 93    | 13.89                    | 25.83   | 1.9              | 3.7E-04  | lipin 1                                                                             |
| CDS1        | RHTO_01718 | 289        | 169   | 83.66                    | 46.94   | 0.6              | 1.2E-09  | phosphatidate cytidyltransferase                                                    |
| CDK1        | RHTO_06970 | 100        | 131   | 28.95                    | 36.38   | 1.3              | 8.5E-02  | diacylglycerol kinase                                                               |
| DGA1        | RHTO_01962 | 5          | 1     | 1.45                     | 0.28    | 0.2              | 1.1E-01  | 2-acylglycerol O-acyltransferase 2                                                  |
| LRO1        | RHTO_01945 | 71         | 103   | 20.55                    | 28.61   | 1.4              | 3.1E-02  | phospholipid:diacylglycerol acyltransferase                                         |
| ATG15       | RHTO_00361 | 25         | 57    | 7.24                     | 15.83   | 2.2              | 7.6E-04  | triacylglycerol lipase, homolog of ATG15                                            |



|             |            |     |     |        |        |       |         |                                                            |
|-------------|------------|-----|-----|--------|--------|-------|---------|------------------------------------------------------------|
| <i>TGL1</i> | RHTO_00993 | 6   | 5   | 1.74   | 1.39   | 0.8   | 7.2E-01 | triacylglycerol lipase                                     |
| <i>TGL2</i> | RHTO_06751 | 48  | 43  | 13.89  | 11.94  | 0.9   | 4.7E-01 | lipase 2                                                   |
| <i>ARE1</i> | RHTO_00726 | 8   | 5   | 2.32   | 1.39   | 0.6   | 3.8E-01 | sterol O-acyltransferase                                   |
| <i>YEH1</i> | RHTO_08052 | 5   | 1   | 1.45   | 0.28   | 0.2   | 1.1E-01 | lysosomal acid lipase/cholesterol ester hydrolase          |
| <i>YEH2</i> | RHTO_01062 | 20  | 43  | 5.79   | 11.94  | 2.1   | 6.2E-03 | ab-hydrolase associated lipase                             |
| <i>FAA1</i> | RHTO_00058 | 50  | 73  | 14.47  | 20.27  | 1.4   | 6.6E-02 | long-chain acyl-CoA synthetase                             |
| <i>FAA2</i> | RHTO_04350 | 10  | 99  | 2.89   | 27.5   | 9.5   | 1.3E-06 | long-chain acyl-CoA synthetase                             |
| <i>FAA3</i> | RHTO_04957 | 26  | 85  | 7.53   | 23.61  | 3.1   | 3.8E-08 | long-chain acyl-CoA synthetase                             |
| <i>FAA4</i> | RHTO_04941 | -   | -   | -      | -      | -     | -       | long-chain acyl-CoA synthetase, putative                   |
| <i>FAA5</i> | RHTO_00057 | 3   | 8   | 0.87   | 2.22   | 2.6   | 1.7E-01 | long-chain acyl-CoA synthetase, putative                   |
| <i>FAA6</i> | RHTO_01192 | 2   | 0   | 0.58   | 0.01   | 0.0   | 2.3E-01 | long-chain acyl-CoA synthetase                             |
| <i>FAT1</i> | RHTO_07775 | 0   | 4   | 0.01   | 1.11   | 111.0 | 6.9E-02 | bifunctional fatty acid transporter/acyl-CoA synthetase    |
| <i>AOX1</i> | RHTO_03890 | 4   | 29  | 1.16   | 8.05   | 6.9   | 5.3E-05 | acyl-CoA oxidase                                           |
| <i>AOX2</i> | RHTO_03776 | 64  | 154 | 18.53  | 42.77  | 2.3   | 4.4E-09 | acyl-CoA oxidase                                           |
| <i>AOX3</i> | RHTO_03787 | 1   | 3   | 0.29   | 0.83   | 2.9   | 4.0E-01 | acyl-CoA oxidase                                           |
| <i>ACD1</i> | RHTO_04971 | 20  | 296 | 5.79   | 82.21  | 14.2  | 2.1E-09 | medium-chain-acyl-CoA dehydrogenase, mitochondrial         |
| <i>ACD2</i> | RHTO_06738 | 106 | 270 | 30.68  | 74.99  | 2.4   | 0.0E+00 | acyl-CoA dehydrogenase                                     |
| <i>ACD3</i> | RHTO_05797 | 316 | 66  | 91.48  | 18.33  | 0.2   | 9.5E-43 | acyl-CoA dehydrogenase                                     |
| <i>ACD4</i> | RHTO_03594 | 142 | 448 | 41.11  | 124.42 | 3.0   | 2.7E-13 | short/branched chain acyl-CoA dehydrogenase, mitochondrial |
| <i>ACD5</i> | RHTO_01625 | 7   | 86  | 2.03   | 23.88  | 11.8  | 8.0E-06 | acyl-CoA dehydrogenase                                     |
| <i>ACD6</i> | RHTO_00397 | 201 | 356 | 58.19  | 98.87  | 1.7   | 9.5E-10 | acyl-CoA dehydrogenase                                     |
| <i>ACD7</i> | RHTO_05970 | 215 | 161 | 62.24  | 44.71  | 0.7   | 1.4E-03 | acyl-CoA dehydrogenase                                     |
| <i>ACD8</i> | RHTO_04579 | 17  | 67  | 4.92   | 18.61  | 3.8   | 7.7E-08 | acyl-CoA dehydrogenase                                     |
| <i>FOX2</i> | RHTO_06581 | 20  | 132 | 5.79   | 36.66  | 6.3   | 2.1E-09 | multifunctional beta-oxidation protein                     |
| <i>ECH1</i> | RHTO_05407 | 45  | 78  | 13.03  | 21.66  | 1.7   | 6.0E-03 | enoyl-CoA hydratase, mitochondrial                         |
| <i>ECH2</i> | RHTO_02517 | 1   | 12  | 0.29   | 3.33   | 11.5  | 2.9E-03 | enoyl-CoA hydratase                                        |
| <i>ECH3</i> | RHTO_04298 | 51  | 42  | 14.76  | 11.66  | 0.8   | 2.6E-01 | enoyl-CoA hydratase/isomerase family protein               |
| <i>HCD1</i> | RHTO_05520 | 26  | 36  | 7.53   | 10     | 1.3   | 2.7E-01 | 3-hydroxyacyl-CoA dehydrogenase, mitochondrial             |
| <i>POT1</i> | RHTO_02848 | 142 | 394 | 41.11  | 109.43 | 2.7   | 2.7E-13 | 3-ketoacyl-CoA thiolase (POT1)                             |
| <i>POT2</i> | RHTO_07118 | 72  | 208 | 20.84  | 57.77  | 2.8   | 0.0E+00 | 3-ketoacyl-coA thiolase peroxisomal A precursor            |
| <i>POT3</i> | RHTO_00300 | 115 | 177 | 33.29  | 49.16  | 1.5   | 1.0E-03 | peroxisomal 3-ketoacyl-CoA thiolase                        |
| <i>ACA1</i> | RHTO_00476 | 320 | 327 | 92.63  | 90.82  | 1.0   | 8.0E-01 | 3-ketoacyl-CoA thiolase, mitochondrial                     |
| <i>DIC1</i> | RHTO_06493 | 403 | 119 | 116.66 | 33.05  | 0.3   | 6.6E-40 | mitochondrial dicarboxylate carrier                        |

\* Audic&Claverie's test (ref 58).

**Supplementary Table S9.** Abbreviations in Figure 1.

| Abbreviations |                                       | Abbreviations |                                     |
|---------------|---------------------------------------|---------------|-------------------------------------|
| Glc           | glucose                               | DMAPP         | dimethylallyl diphosphate           |
| G-6-P         | glucose-6-phosphate                   | GPP           | geranyl pyrophosphate               |
| F-6-P         | fructose-6-phosphate                  | FPP           | farnesyl pyrophosphate              |
| G-1-P         | glucose-1-phosphate                   | GGPP          | geranylgeranyl pyrophosphate        |
| F-1,6-BP      | fructose-1,6-bisphosphate             | AT            | acetyltransferase                   |
| G-3-P         | glyceraldehyde 3-phosphate            | ER            | enoyl reductase                     |
| G-1,3-BP      | glycerate-1,3-bisphosphate            | MPT           | malonyl/palmitoyl transferase       |
| 3-PGA         | 3-phosphoglyceric acid                | PPT           | phosphopantetheinyl transferase     |
| 2-PGA         | 2-phosphoglyceric acid                | ACP           | acyl carrierprotein protein         |
| PEP           | phosphoenolpyruvate                   | DH            | dehydratase                         |
| Pyr           | pyruvate                              | KR            | ketoacyl reductase                  |
| AcCoA         | acetyl coenzyme A                     | KS            | ketoacyl synthase                   |
| OAA           | oxaloacetate                          | DHAP          | dihydroxyacetonephosphate           |
| 6-PGL         | 6-phosphogluconolactone               | Glycerol-3-P  | glycerol 3-phosphate                |
| 6-PG          | 6-phosphogluconate                    | Lyso-PA       | lysophosphatidic acid               |
| Ru-5-P        | ribulose-5-phosphate                  | Acyl-DHAP     | acyl dihydroxyacetonephosphate      |
| X-5-P         | xylulose-5-phosphate                  | PA            | phosphatidic acid                   |
| Ri-5-P        | ribose-5-phosphate                    | DAG           | diacylglycerol                      |
| E-4-P         | erythrose-4-phosphate                 | TAG           | triacylglycerol                     |
| S-7-P         | sedoheptulose-7-phosphate             | CDP-DAG       | cytidine diphosphate-diacylglycerol |
| AKG           | $\alpha$ -ketoglutarate               | PL            | phospholipid                        |
| Glu           | glutamate                             | SE            | steryl ester                        |
| Gln           | glutamine                             | FFA           | free fatty acid                     |
| Malonyl-CoA   | malonyl coenzyme A                    | AT            | acyltransferase                     |
| Palmitoyl-CoA | palmitoyl coenzyme A                  | ER            | enoyl reductase                     |
| Acyl-CoA      | acyl coenzyme A                       | DH            | dehydratase                         |
| AcAcCoA       | acetoacetyl coenzyme A                | MPT           | malonyl/palmitoyl transferase;      |
| HMG-CoA       | 3-hydroxy-3-methylglutaryl coenzyme A | ACP           | acyl carrier protein;               |
| MVA           | mevalonic acid                        | KR            | ketoacyl reductase;                 |
| MVA-5P        | mevalonate-5-phosphate                | KS            | ketoacyl synthase;                  |
| MVA-5PP       | mevalonate-5-pyrophosphate            | PPT           | phosphopantetheinyl transferase     |
| IPP           | 3-isopentenyl pyrophosphate           |               |                                     |

**Supplementary Table S10.** Highly expressed genes described in Figure 4 and their annotations.

| Group      | ORF         | Gene symbol                                     | Annotation                                                   |
|------------|-------------|-------------------------------------------------|--------------------------------------------------------------|
| A          | RHTO_00124  |                                                 | hypothetical protein                                         |
|            | RHTO_00177  |                                                 | inorganic pyrophosphatase                                    |
|            | RHTO_00539  | <i>ACO1</i>                                     | aconitate hydratase                                          |
|            | RHTO_00545  |                                                 | ubiquinol-cytochrome c reductase core subunit 2              |
|            | RHTO_00857  |                                                 | histone H3B (partial sequence n terminus)                    |
|            | RHTO_01414  |                                                 | small ubiquitin-related modifier                             |
|            | RHTO_01515  |                                                 | hypothetical protein                                         |
|            | RHTO_01776  |                                                 | rRNA 2'-O-methyltransferase fibrillar                        |
|            | RHTO_01875  |                                                 | Cytochrome b-c1 complex, subunit 10                          |
|            | RHTO_01933  |                                                 | 60s ribosomal protein l39                                    |
|            | RHTO_02067  |                                                 | 40s ribosomal protein s4                                     |
|            | RHTO_02175  |                                                 | 60s acidic ribosomal protein p2                              |
|            | RHTO_02232  |                                                 | 60s acidic ribosomal protein p0                              |
|            | RHTO_02290  |                                                 | 60s ribosomal protein l10                                    |
|            | RHTO_02584  |                                                 | 60s ribosomal protein l29                                    |
|            | RHTO_02614  |                                                 | Hyaluronan/mRNA-binding protein                              |
|            | RHTO_02750  |                                                 | 60s acidic ribosomal protein p1                              |
|            | RHTO_02851  |                                                 | ubiquinol-cytochrome c reductase subunit 9                   |
|            | RHTO_03081  |                                                 | 40s ribosomal protein s30                                    |
|            | RHTO_03117  |                                                 | adenylate kinase                                             |
|            | RHTO_03206  |                                                 | ATP synthase subunit beta                                    |
|            | RHTO_03654  |                                                 | F-type H <sup>+</sup> -transporting ATPase subunit h         |
|            | RHTO_03655  |                                                 | mitochondrial ATPase inhibitor, IATP                         |
|            | RHTO_03666  |                                                 | cytochrome c oxidase subunit Va                              |
|            | RHTO_03705  |                                                 | large subunit ribosomal protein L40e                         |
|            | RHTO_03737  |                                                 | 60s ribosomal protein l20                                    |
|            | RHTO_03921  |                                                 | elongation factor 1-gamma                                    |
|            | RHTO_03922  |                                                 | elongation factor 1-gamma                                    |
|            | RHTO_03968  |                                                 | large subunit ribosomal protein L7Ae                         |
|            | RHTO_04030  |                                                 | calmodulin                                                   |
|            | RHTO_04043  |                                                 | Histone H3                                                   |
|            | RHTO_04088  |                                                 | Protein of unknown function DUF2611                          |
|            | RHTO_04334  |                                                 | respiratory chain complex I component                        |
|            | RHTO_04427  |                                                 | ATP synthase oligomycin sensitivity conferral                |
|            | RHTO_04566  |                                                 | ketol-acid reductoisomerase (partial sequence c terminus)    |
|            | RHTO_04839  |                                                 | 60s ribosomal protein l15                                    |
|            | RHTO_04874  |                                                 | ran-specific GTPase-activating protein                       |
|            | RHTO_04891  |                                                 | NADH dehydrogenase [ubiquinone] 1 alpha subcomplex subunit 4 |
|            | RHTO_05035  |                                                 | 60s ribosomal protein l43                                    |
|            | RHTO_05096  |                                                 | translation elongation factor EF-1 alpha subunit             |
|            | RHTO_05097  |                                                 | elongation factor EF-1 alpha subunit                         |
|            | RHTO_05103  |                                                 | 60s ribosomal protein l32                                    |
|            | RHTO_05117  |                                                 | peroxiredoxin (alkyl hydroperoxide reductase subunit C)      |
|            | RHTO_05208  |                                                 | cytochrome c                                                 |
|            | RHTO_05390  |                                                 | F-type H <sup>+</sup> -transporting ATPase subunit b         |
|            | RHTO_05440  |                                                 | histone H2A (partial sequence c terminus)                    |
|            | RHTO_05517  |                                                 | 60s ribosomal protein l6                                     |
| RHTO_05647 |             | mitochondrial F1 atpase subunit                 |                                                              |
| RHTO_05648 |             | ATP synthase subunit alpha                      |                                                              |
| RHTO_05796 |             | molecular chaperone DnaK                        |                                                              |
| RHTO_06010 |             | 40s ribosomal protein s23                       |                                                              |
| RHTO_06057 |             | ATP-synthase delta chain                        |                                                              |
| RHTO_06114 |             | hypothetical protein                            |                                                              |
| RHTO_06190 |             | 60s ribosomal protein l27                       |                                                              |
| RHTO_06329 |             | single-strand binding protein                   |                                                              |
| RHTO_06406 | <i>CIT1</i> | citrate synthase                                |                                                              |
| RHTO_06524 |             | conserved hypothetical protein                  |                                                              |
| RHTO_06642 |             | peptidylprolyl isomerase                        |                                                              |
| RHTO_06766 |             | 60s ribosomal protein l44                       |                                                              |
| RHTO_06972 |             | chaperonin GroES                                |                                                              |
| RHTO_07038 |             | ATP synthase D chain, mitochondrial             |                                                              |
| RHTO_07236 |             | phenazine biosynthesis PhzC/PhzF family protein |                                                              |
| RHTO_07504 |             | secreted protein                                |                                                              |
| RHTO_07620 |             | GDP-mannose 4,6-dehydratase                     |                                                              |
| RHTO_07648 |             | voltage-dependent ion-selective channel         |                                                              |
| RHTO_07756 |             | large subunit ribosomal protein L17e            |                                                              |
| RHTO_07772 |             | G-protein complex beta subunit                  |                                                              |
| RHTO_07773 | <i>GPM4</i> | Protein of phosphoglycerate mutase 1 family     |                                                              |
| RHTO_07842 |             | heat shock 70kDa protein 1/8                    |                                                              |
| B          | RHTO_00009  |                                                 | Peptidase A1 family protein                                  |
|            | RHTO_00066  |                                                 | GMP synthase (glutamine-hydrolysing)                         |
|            | RHTO_00085  |                                                 | UPF0041 domain protein                                       |
|            | RHTO_00152  |                                                 | threonyl-trna synthetase                                     |
|            | RHTO_00216  |                                                 | H/ACA ribonucleoprotein complex subunit 3                    |
|            | RHTO_00443  |                                                 | thioredoxin                                                  |
|            | RHTO_00453  |                                                 | ribosomal biogenesis protein Gar2                            |
|            | RHTO_00534  | <i>SDH3</i>                                     | succinate dehydrogenase (ubiquinone) cytochrome b subunit    |

|            |             |                                                                                |
|------------|-------------|--------------------------------------------------------------------------------|
| RHTO_00755 |             | Cytochrome c oxidase, subunit VIIa                                             |
| RHTO_00984 |             | MFS transporter                                                                |
| RHTO_01082 |             | Transcription factor                                                           |
| RHTO_01344 |             | amino acid transmembrane transporter                                           |
| RHTO_01398 |             | ribosome assembly protein Noc2                                                 |
| RHTO_01403 |             | beta subunit of the sec61p er translocation complex (sec61p-sss1p-sbh1p)       |
| RHTO_01637 |             | pre-mRNA-splicing factor ATP-dependent RNA helicase DHX15/PRP43                |
| RHTO_01638 |             | ubiquinol-cytochrome c reductase subunit 8                                     |
| RHTO_02144 |             | 37s ribosomal protein s5                                                       |
| RHTO_02297 |             | phosphoribosylaminoimidazole carboxylase                                       |
| RHTO_02453 |             | mitochondrial import receptor subunit TOM40                                    |
| RHTO_03307 |             | hypothetical protein                                                           |
| RHTO_03555 |             | SNF2 family helicase Ino80                                                     |
| RHTO_03677 |             | hypothetical protein                                                           |
| RHTO_03952 |             | translation initiation factor eIF-2 gamma subunit                              |
| RHTO_04104 |             | diamine N-acetyltransferase                                                    |
| RHTO_04193 |             | phosphomannomutase                                                             |
| RHTO_04426 |             | translation initiation factor eIF-3 subunit 8                                  |
| RHTO_04602 | <i>CRTI</i> | Phytoene dehydrogenase                                                         |
| RHTO_04815 |             | expansin family protein                                                        |
| RHTO_04819 |             | phosphoribosylaminoimidazolecarboxamide formyltransferase / IMP cyclohydrolase |
| RHTO_04946 |             | NADH-ubiquinone oxidoreductase                                                 |
| RHTO_05437 |             | ABC bile acid transporter                                                      |
| RHTO_05727 |             | Xaa-Pro dipeptidase                                                            |
| RHTO_05854 |             | protein of heat shock protein 70 family                                        |
| RHTO_05866 |             | hypothetical protein (partial sequence c terminus)                             |
| RHTO_05883 |             | T-complex protein 1 subunit eta                                                |
| RHTO_06035 |             | lysine-trna ligase                                                             |
| RHTO_06236 |             | Ribosomal protein S8e/ribosomal biogenesis NSA2 family protein                 |
| RHTO_06293 |             | DNA topoisomerase I                                                            |
| RHTO_06431 |             | N-acetyltransferase 10, KRE33                                                  |
| RHTO_06538 |             | delta-12 fatty acid desaturase                                                 |
| RHTO_06598 |             | translation initiation factor eIF-3 subunit 12                                 |
| RHTO_06625 |             | ribonucleoprotein                                                              |
| RHTO_06679 |             | protein farnesyltransferase subunit beta                                       |
| RHTO_06807 |             | zuotin                                                                         |
| RHTO_06818 |             | nucleolar protein 56                                                           |
| RHTO_07244 |             | mitochondrial small subunit ribosomal protein S28                              |
| RHTO_07729 |             | H/ACA ribonucleoprotein complex subunit 2                                      |
| RHTO_07926 |             | translation initiation factor eIF-6                                            |
| RHTO_07988 |             | polyadenylate-binding protein                                                  |
| C          |             |                                                                                |
| RHTO_00225 |             | glutathione peroxidase                                                         |
| RHTO_00229 |             | alpha-glucosidase, glycoside hydrolase family 13 protein                       |
| RHTO_00424 |             | AN1-type zinc finger protein                                                   |
| RHTO_00521 |             | 7alpha-cephem-methoxylase P8 chain related protein                             |
| RHTO_00693 |             | bcl-2 associated athanogene 3-like protein                                     |
| RHTO_01036 |             | conserved hypothetical protein                                                 |
| RHTO_01102 |             | Ras-related protein Rap-11A                                                    |
| RHTO_01320 |             | riboflavin kinase                                                              |
| RHTO_01329 | <i>TPH</i>  | triosephosphate isomerase (TIM)                                                |
| RHTO_01466 |             | Short-chain dehydrogenase/reductase SDR family protein                         |
| RHTO_01497 |             | stress response RCI peptide                                                    |
| RHTO_01538 |             | protein of heat shock protein Hsp70 family                                     |
| RHTO_01597 |             | NADH dehydrogenase (ubiquinone) Fe-S protein 1                                 |
| RHTO_01666 |             | Transcription factor                                                           |
| RHTO_01949 |             | hypothetical protein                                                           |
| RHTO_02032 | <i>EAS1</i> | fatty acid synthase subunit beta, fungi type                                   |
| RHTO_02103 |             | Thioredoxin fold domain protein                                                |
| RHTO_02113 |             | sulfite reductase (NADPH) hemoprotein beta-component                           |
| RHTO_02139 | <i>EAS2</i> | fatty acid synthase subunit alpha, fungi type                                  |
| RHTO_02260 |             | protein of short-chain dehydrogenase/reductase SDR family                      |
| RHTO_02346 |             | Barwin-related endoglucanase domain protein                                    |
| RHTO_02448 |             | GTP-binding protein SAR1                                                       |
| RHTO_02628 | <i>PYC1</i> | pyruvate carboxylase                                                           |
| RHTO_02670 |             | hypothetical protein                                                           |
| RHTO_02686 |             | conserved hypothetical protein                                                 |
| RHTO_02888 |             | conserved hypothetical protein                                                 |
| RHTO_03100 |             | hypothetical protein                                                           |
| RHTO_03201 |             | DOPA 4,5-dioxygenase                                                           |
| RHTO_03853 |             | Acyl-CoA-binding protein, ACBP                                                 |
| RHTO_04032 |             | phenazine biosynthesis PhzC/PhzF family protein                                |
| RHTO_04650 | <i>GDH1</i> | glutamate dehydrogenase (NADP+)                                                |
| RHTO_05032 |             | endoglucanase                                                                  |
| RHTO_05324 |             | pirin family protein                                                           |
| RHTO_05438 |             | aromatic ring-opening dioxygenase                                              |
| RHTO_06037 |             | protein of GFA family                                                          |
| RHTO_06292 |             | NADH:ubiquinone oxidoreductase, B12 subunit                                    |
| RHTO_06575 |             | NmrA-like domain containing protein                                            |
| RHTO_06626 |             | Arrestin-like, N-terminal and Immunoglobulin E-set domain protein              |
| RHTO_06652 |             | SNF2-related domain containing protein                                         |

|   |            |             |                                                                                         |
|---|------------|-------------|-----------------------------------------------------------------------------------------|
|   | RHTO_07076 |             | nitroreductase                                                                          |
|   | RHTO_07456 |             | hypothetical protein                                                                    |
|   | RHTO_07647 |             | hypothetical protein                                                                    |
| D | RHTO_00155 |             | cyclophilin, peptidyl-prolyl cis-trans isomerase                                        |
|   | RHTO_00206 |             | superoxide dismutase, Fe-Mn family                                                      |
|   | RHTO_01358 |             | translation initiation factor eIF-1A                                                    |
|   | RHTO_02788 | <i>GNDI</i> | 6-phosphogluconate dehydrogenase                                                        |
|   | RHTO_03087 |             | U4/U6 small nuclear ribonucleoprotein SNU13                                             |
|   | RHTO_03113 |             | 60s ribosomal protein l16                                                               |
|   | RHTO_04131 |             | glycine hydroxymethyltransferase                                                        |
|   | RHTO_04592 |             | 60s ribosomal protein l33                                                               |
|   | RHTO_04740 |             | 40s ribosomal protein s18                                                               |
|   | RHTO_05162 |             | elongation factor Tu                                                                    |
|   | RHTO_05630 |             | regulatory protein suaprgal                                                             |
|   | RHTO_06701 |             | hypothetical protein                                                                    |
|   | RHTO_07146 |             | mitochondrial ATPase, F1 complex, epsilon subunit                                       |
|   | RHTO_07151 |             | cellular nucleic acid-binding protein                                                   |
|   | RHTO_07734 |             | histone H2A                                                                             |
|   | RHTO_07843 |             | elongation factor EF-1 beta subunit                                                     |
| E | RHTO_00314 |             | S-phase kinase-associated protein 1                                                     |
|   | RHTO_00340 |             | GCN5-related N-acetyltransferase                                                        |
|   | RHTO_00455 |             | NADH dehydrogenase (ubiquinone) 1 beta subcomplex 8                                     |
|   | RHTO_00488 |             | UbiE/COQ5 family methyltransferase                                                      |
|   | RHTO_00627 |             | hypothetical protein                                                                    |
|   | RHTO_00723 | <i>SDH4</i> | succinate dehydrogenase (ubiquinone) membrane anchor subunit                            |
|   | RHTO_01101 |             | proton-dependent oligopeptide transporter, POT family                                   |
|   | RHTO_01139 |             | Protein of 14-3-3 protein family                                                        |
|   | RHTO_01289 | <i>IDH1</i> | isocitrate dehydrogenase (NAD+)                                                         |
|   | RHTO_02257 |             | adenylosuccinate synthetase                                                             |
|   | RHTO_02398 |             | Cyclin PHO80-like family protein                                                        |
|   | RHTO_03155 |             | CCCH finger DNA binding protein                                                         |
|   | RHTO_03248 | <i>TKL1</i> | transketolase                                                                           |
|   | RHTO_03543 | <i>LAT1</i> | pyruvate dehydrogenase E2 component                                                     |
|   | RHTO_03588 |             | NADH dehydrogenase (ubiquinone) 1 beta subcomplex 7                                     |
|   | RHTO_03741 |             | conserved hypothetical protein                                                          |
|   | RHTO_03852 |             | zip-like iron-zinc transporter                                                          |
|   | RHTO_03915 | <i>ACL1</i> | ATP citrate synthase                                                                    |
|   | RHTO_04266 |             | MFS transporter, sugar:H+ symporter                                                     |
|   | RHTO_04276 |             | pyridoxamine phosphate oxidase family protein                                           |
|   | RHTO_04330 |             | thiamine biosynthesis protein Nmt1                                                      |
|   | RHTO_04448 |             | protein of ornithine decarboxylase antizyme family                                      |
|   | RHTO_04628 |             | hypothetical protein                                                                    |
|   | RHTO_04861 |             | conserved hypothetical protein                                                          |
|   | RHTO_04910 |             | Cytochrome c oxidase, subunit VIIa                                                      |
|   | RHTO_05679 |             | thiamine biosynthetic enzyme                                                            |
|   | RHTO_05829 |             | heterogeneous nuclear ribonucleoprotein M                                               |
|   | RHTO_05912 |             | IMP dehydrogenase                                                                       |
|   | RHTO_06048 |             | ATP synthase gamma chain                                                                |
|   | RHTO_06080 |             | MFS monosaccharide transporter                                                          |
|   | RHTO_06449 |             | siderophore biosynthesis protein                                                        |
|   | RHTO_06773 |             | UDP-galactopyranose mutase                                                              |
|   | RHTO_06930 |             | mitochondrial peroxiredoxin 6, 1-Cys peroxiredoxin                                      |
|   | RHTO_07025 |             | Trp repressor binding protein                                                           |
|   | RHTO_07616 |             | EXTL3, alpha-1,4-N-acetylglucosaminyltransferase, glycosyltransferase family 64 protein |
|   | RHTO_07708 |             | alpha tubulin                                                                           |
|   | RHTO_07812 |             | phosphoglycerate mutase family protein                                                  |
|   | RHTO_07893 | <i>LPD1</i> | dihydrolipoyl dehydrogenase                                                             |
|   | RHTO_07939 | <i>SOL3</i> | 6-phosphogluconolactonase                                                               |
|   | RHTO_08148 |             | conserved hypothetical protein                                                          |
| F | RHTO_00600 |             | conserved hypothetical protein                                                          |
|   | RHTO_00789 |             | molecular chaperone HtpG                                                                |
|   | RHTO_02321 |             | ubiquitin-conjugating enzyme E2 D/E                                                     |
|   | RHTO_03987 |             | glycine-rich RNA binding protein                                                        |
|   | RHTO_04325 |             | 40s ribosomal protein s6                                                                |
|   | RHTO_04577 |             | Cytochrome c oxidase, subunit Vb                                                        |
|   | RHTO_04890 |             | 40s ribosomal protein s7                                                                |
|   | RHTO_05418 |             | gpi anchored protein                                                                    |
|   | RHTO_06539 |             | 40s ribosomal protein s12                                                               |
|   | RHTO_06973 |             | Protein of chaperonin Cpn60 family                                                      |
|   | RHTO_06994 |             | 40s ribosomal protein s21                                                               |
|   | RHTO_07359 |             | GTP-binding nuclear protein Ran                                                         |
| G | RHTO_00070 |             | ubiquinol-cytochrome c reductase complex 17 kd protein                                  |
|   | RHTO_00323 | <i>ENO1</i> | enolase                                                                                 |
|   | RHTO_00354 |             | 40s ribosomal protein s10                                                               |
|   | RHTO_00469 |             | 60s ribosomal protein l34                                                               |
|   | RHTO_00474 |             | mitochondrial phosphate carrier protein                                                 |
|   | RHTO_00632 |             | large subunit ribosomal protein L27Ae                                                   |
|   | RHTO_00673 | <i>GLN1</i> | glutamine synthetase                                                                    |
|   | RHTO_01016 |             | 40s ribosomal protein s28                                                               |
|   | RHTO_01017 |             | 40s ribosomal protein s5                                                                |

|            |              |                                                                        |
|------------|--------------|------------------------------------------------------------------------|
| RHTO_01048 |              | acyl-carrier protein                                                   |
| RHTO_01290 | <i>IDH2</i>  | isocitrate dehydrogenase (NAD+)                                        |
| RHTO_01367 |              | 37s ribosomal protein s24                                              |
| RHTO_01695 |              | adenosylhomocysteinase                                                 |
| RHTO_01866 |              | plasma membrane H+-transporting ATPase                                 |
| RHTO_01869 |              | ubiquinol-cytochrome c reductase iron-sulfur subunit                   |
| RHTO_01873 |              | 60s ribosomal protein l5                                               |
| RHTO_01907 |              | translation initiation factor eIF-4A                                   |
| RHTO_02009 |              | 60s ribosomal protein l30                                              |
| RHTO_02115 |              | small subunit ribosomal protein S27Ac                                  |
| RHTO_02116 |              | 60s ribosomal protein l37                                              |
| RHTO_02176 |              | 40s ribosomal protein s15                                              |
| RHTO_02373 |              | large subunit ribosomal protein L14e                                   |
| RHTO_02403 |              | 40s ribosomal protein s25                                              |
| RHTO_02455 |              | 60s ribosomal protein l26                                              |
| RHTO_02483 |              | 40s ribosomal protein s27                                              |
| RHTO_02569 |              | heat shock 70kDa protein 1/8                                           |
| RHTO_02577 |              | 60s ribosomal protein l23                                              |
| RHTO_02646 |              | Protein of 14-3-4 protein family                                       |
| RHTO_02697 |              | elongation factor 3                                                    |
| RHTO_03043 | <i>FBA1</i>  | fructose-bisphosphate aldolase, class II                               |
| RHTO_03161 |              | 60s ribosomal protein l22                                              |
| RHTO_03292 |              | nucleoside-diphosphate kinase                                          |
| RHTO_03294 |              | ubiquinol-cytochrome c reductase subunit 7                             |
| RHTO_03373 |              | translation initiation factor 5A                                       |
| RHTO_03560 |              | actin                                                                  |
| RHTO_03573 |              | translation elongation factor 2                                        |
| RHTO_03637 |              | 40s ribosomal protein s9                                               |
| RHTO_03665 |              | 60s ribosomal protein l21                                              |
| RHTO_03746 | <i>GAPDH</i> | glyceraldehyde 3-phosphate dehydrogenase                               |
| RHTO_03896 |              | mitochondrial processing peptidase beta subunit                        |
| RHTO_03965 |              | 60s ribosomal protein l7                                               |
| RHTO_03967 |              | 60s ribosomal protein l36                                              |
| RHTO_04048 |              | 60s ribosomal protein l24                                              |
| RHTO_04114 |              | 60s ribosomal protein l18                                              |
| RHTO_04152 |              | cytochrome c1                                                          |
| RHTO_04184 |              | histone H4                                                             |
| RHTO_04185 |              | histone H3                                                             |
| RHTO_04216 |              | 40s ribosomal protein s14                                              |
| RHTO_04326 |              | 40s ribosomal protein s13                                              |
| RHTO_04363 | <i>MDHI</i>  | L-malate dehydrogenase                                                 |
| RHTO_04421 |              | SERF family protein                                                    |
| RHTO_04531 |              | hypothetical protein                                                   |
| RHTO_04593 |              | large subunit ribosomal protein L31e                                   |
| RHTO_04816 |              | 60s ribosomal protein l19                                              |
| RHTO_05011 |              | 40s ribosomal protein s3                                               |
| RHTO_05106 |              | solute carrier family 25 (mitochondrial carrier)                       |
| RHTO_05119 |              | 60s ribosomal protein l13                                              |
| RHTO_05130 |              | 40s ribosomal protein s19                                              |
| RHTO_05147 |              | argininosuccinate synthase                                             |
| RHTO_05301 |              | 60s ribosomal protein l10a                                             |
| RHTO_05368 |              | 40s ribosomal protein s26                                              |
| RHTO_05447 |              | 40s ribosomal protein s16                                              |
| RHTO_05617 |              | 60s ribosomal protein l11                                              |
| RHTO_05740 |              | protein of short-chain dehydrogenase/reductase SDR family              |
| RHTO_05917 |              | 60s ribosomal protein l2                                               |
| RHTO_05964 |              | 60s ribosomal protein l9                                               |
| RHTO_06133 |              | ubiquitin C                                                            |
| RHTO_06166 |              | 40s ribosomal protein s0                                               |
| RHTO_06248 |              | 40s ribosomal protein s22                                              |
| RHTO_06249 |              | 40s ribosomal protein s17                                              |
| RHTO_06384 |              | Peptidyl-prolyl cis-trans isomerase, FKBP-type                         |
| RHTO_06491 |              | protein of cation efflux protein family, zinc transporter              |
| RHTO_06792 |              | 60s ribosomal protein l35                                              |
| RHTO_06815 |              | 40s ribosomal protein s1                                               |
| RHTO_06955 | <i>TALI</i>  | transaldolase                                                          |
| RHTO_07080 |              | S-adenosylmethionine synthetase                                        |
| RHTO_07200 |              | hypothetical protein                                                   |
| RHTO_07334 |              | translationally controlled tumor protein homolog                       |
| RHTO_07683 |              | 40s ribosomal protein s2 (partial sequence n rermimus)                 |
| RHTO_07691 |              | 5-methyltetrahydropteroyltryglutamate-homocysteine S-methyltransferase |
| RHTO_07771 |              | 60s ribosomal protein l12                                              |
| RHTO_07779 |              | ADP-ribosylation factor                                                |
| RHTO_07804 |              | F-type H+-transporting ATPase subunit f                                |
| RHTO_07868 |              | 60s ribosomal protein l2                                               |
| RHTO_07886 |              | 60s ribosomal protein l23a                                             |
| RHTO_07911 |              | 40s ribosomal protein s20                                              |
| RHTO_07954 |              | 60s ribosomal protein l3                                               |
| RHTO_08150 |              | 40s ribosomal protein s8                                               |
| RHTO_08151 |              | 40s ribosomal protein s29                                              |

**Supplementary Table S11.** Total spectral counts and proteins identified from the seed, 24 h and 96 h<sup>a</sup>

| Sample name | Total spectral counts | Unique peptides | Total proteins found <sup>b</sup> | Accumulative proteins found <sup>b</sup> | Identified proteins <sup>c</sup> |
|-------------|-----------------------|-----------------|-----------------------------------|------------------------------------------|----------------------------------|
| Seed 1      | 1929 (35949)          | 186 (7280)      | 67 (1638)                         |                                          |                                  |
| Seed 2      | 1721 (36160)          | 184 (8313)      | 63 (1755)                         | 105 (2088)                               | 50 (1473)                        |
| Seed 3      | 1717 (33679)          | 188 (8003)      | 65 (1630)                         |                                          |                                  |
| 24 h 1      | 699 (18288)           | 116 (5692)      | 38 (1418)                         |                                          |                                  |
| 24 h 2      | 1009 (28171)          | 131 (6569)      | 47 (1555)                         | 78 (2029)                                | 29 (1353)                        |
| 24 h 3      | 819 (28923)           | 119 (7782)      | 43 (1675)                         |                                          |                                  |
| 96 h 1      | 818 (28711)           | 146 (8384)      | 56 (1901)                         |                                          |                                  |
| 96 h 2      | 722 (28992)           | 124 (6975)      | 46 (1613)                         | 84 (2270)                                | 35 (1522)                        |
| 96 h 3      | 474 (21697)           | 103 (6409)      | 38 (1669)                         |                                          |                                  |
| Total       | 9908 (260570)         | -               | -                                 | 184 (3108)                               | 63 (2057)                        |

a. data from Liu et al (ref 32) and this study (in parentheses) were presented.

b.  $\geq 2$  unique peptides and false-positive-rate  $< 5\%$  for previous data and optimal criteria obtained from SFOER and false-positive-rate  $< 1\%$  for this study.

c. at least two occurrences within three replicates.

## Supplementary Methods

**Electrophoretic karyotyping.** The genome size and chromosome number were estimated by contour-clamped homogeneous electric field (CHEF) technology according to known procedures<sup>1</sup>, excepting that MAN5C<sup>2</sup> was used for cell lysis. Results were shown in **Supplementary Figure S5**. Cells of stationary phase were harvested by centrifugation (1000 g, 15 min and 4 °C), then washed twice with 0.05 M EDTA (pH 7.6) at 4 °C. Approximate 10<sup>9</sup> cells suspended in 500 ul citrate buffer (pH 4.5, 0.3 M) with EDTA (0.1 M) and MAN5C (10 U/ml) were mixed with 500 ul 1.2% low melting point agarose (Bio Basic Inc.), which was pre-melted in citrate buffer (pH 4.5, 0.3 M) with EDTA (0.1 M) and equilibrated to 45 °C. The cell:agarose suspension was pipetted into casting molds and cooled at 4 °C for 20 min. Incubate the cell:agarose plugs in 2× volume of lysis buffer (0.3 M citrate, 0.1 M EDTA, 5 U/ml MAN5C, pH 4.5) at 50 °C for 2 hours, and then replace with 2× volume of digestion buffer (0.45 M EDTA, 1% Sarkosyl, 1 mg/ml protease K, pH 8.0) and refresh the digestion buffer after 24 hours. After incubation at 50 °C for 48 h, the plugs were directly stored at 4 °C until used. Plugs of appropriate volume were cut and inserted into loading wells of 1% agarose gel (D5, Takara). The electrophoresis was run at 14 °C in 0.5× TBE buffer (45 mM Tris-borate, 1 mM EDTA) with a CHEF apparatus (Liuyi Instrument Factory, Beijing). The chromosomes of *S. cerevisiae* (NEB) and *Hansenula wingei* (Bio-Rad) were used as molecular size standards. The setup of electrophoresis was constant in reorientation angle of 120° but variant in voltage and switch time. The optimal parameters obtained was ramped switch time of 100-200 s at 4 V/cm for 20 h and then 200-400 s at 3.5 V/cm for 34 h. Similar karyotypes of *R. toruloides* ATCC 10788 (type strain) and NP11 were found, and smaller chromosome bands were found in *R. toruloides* Y4 and NP5-2.

**Initial gene prediction.** Repetitive sequences were predicted *de novo* by RepeatModeler (v 1.0.3, <http://www.repeatmasker.org/RepeatModeler.html>). 25 repeat families were classified with TEclass<sup>3</sup> and used as the search library for RepeatMasker (v 3.2.9, <http://www.repeatmasker.org/>). For gene prediction, 14830 Unigenes from *de novo* assembly and 6602 transcription unit (8234 transcripts) from *ab initio* assembly were aligned to genome sequence. Gene models were predicted with Augustus<sup>4</sup>, GlimmerHMM<sup>5</sup>, SNAP<sup>6</sup>, and GeneMark-ES<sup>7</sup>. The programs were trained on the species of *Cryptococcus neoformans*, excepting for GeneMark-ES who was self-trained. Proteomes of relative species were used for homology-based gene prediction with GeneWise<sup>8</sup>. For non-coding sequence prediction, putative tRNA coding genes were identified with tRNAScan-SE<sup>9</sup>. The rDNA locus including 5S, 18S and 26S rRNA coding genes was PCR amplified and sequenced. The length of rDNA repeat unit is 8.3 kb, and it's attached to Scaffold 22. Spliceosomal RNAs (SnRNA) were scanned with cmsearch from Infernal package<sup>10</sup> and classified according to RFAM database<sup>11</sup>, and U2 (2 members), U4 (2 members) and U6 (2 members) SnRNAs were identified.

## Supplementary References

1. Herschleb, J., Ananiev, G. & Schwartz, D.C. Pulsed-field gel electrophoresis. *Nat. Protoc.* **2**, 677—684 (2007).
2. Yang, F., Zhang, S., Jin, G., Lin, X. & Zhao, Z.K. Purification and characterization of a  $\beta$ -1,3-glucomannanase expressed in *Pichia pastoris*. *Enzyme Microb. Technol.* **49**, 223—228 (2011).
3. Abrusan, G., Grundmann, N., DeMester, L. & Makalowski, W. TEclass—a tool for automated classification of unknown eukaryotic transposable elements. *Bioinformatics* **25**, 1329—1330 (2009).
4. Stanke, M., Tzvetkova, A. & Morgenstern, B. AUGUSTUS at EGASP: using EST, protein and genomic alignments for improved gene prediction in the human genome. *Genome Biol.* **7**, S11 (2006).
5. Majoros, W. H., Pertea, M. & Salzberg, S. L. TigrScan and GlimmerHMM: two open source *ab initio* eukaryotic gene-finders. *Bioinformatics* **20**, 2878—2879 (2004).
6. Korf, I. Gene finding in novel genomes. *BMC Bioinformatics* **5**, 59 (2004).



7. Ter-Hovhannisyan, V., Lomsadze, A., Chernoff, Y. O. & Borodovsky, M. Gene prediction in novel fungal genomes using an *ab initio* algorithm with unsupervised training. *Genome Res.* **18**, 1979—1990 (2008).
8. Birney, E. & Durbin, R. Using GeneWise in the Drosophila annotation experiment. *Genome Res.* **10**, 547—548 (2000).
9. Lowe, T. M. & Eddy, S. R. tRNAscan-SE: a program for improved detection of transfer RNA genes in genomic sequence. *Nucleic Acids Res.* **25**, 0955—0964 (1997).
10. Nawrocki, E. P., Kolbe, D. L. & Eddy, S. R. Infernal 1.0: inference of RNA alignments. *Bioinformatics* **25**, 1335—1337 (2009).
11. Griffiths-Jones, S. Rfam: annotating non-coding RNAs in complete genomes. *Nucleic Acids Res.* **33**, D121—D124 (2004).
